1  
2  
3  
4  
5  
6  
7  
8  
9  
10  
11  
12  
13  
14  
15  
16  
17  
18  
19  
20  
21  
22  
23  
24  
25  
26

**An extracellular vesicle targeting ligand that binds to Arc proteins and facilitates Arc transport *in vivo***

**Peter H. Lee\*, Michael Anaya, Mark S. Ladinsky, Justin M. Reitsma<sup>1</sup>, and Kai Zinn\***

Division of Biology and Biological Engineering, California Institute of Technology, Pasadena, CA  
91125 USA

<sup>1</sup>Current address: AbbVie, 1 N Waukegan Rd, North Chicago, IL 60064

\*To whom correspondence should be addressed ([hlee@caltech.edu](mailto:hlee@caltech.edu), [zinnk@caltech.edu](mailto:zinnk@caltech.edu))

27

28

29 **Abstract**

30 Communication between distant cells can be mediated by extracellular vesicles (EVs) that  
31 deliver proteins and RNAs to recipient cells. Little is known about how EVs are targeted to  
32 specific cell types. Here we identify the *Drosophila* cell-surface protein Stranded at second  
33 (Sas) as a targeting ligand for EVs. Full-length Sas is present in EV preparations from  
34 transfected *Drosophila* Schneider 2 (S2 cells). Sas is a binding partner for the Ptp10D receptor  
35 tyrosine phosphatase, and Sas-bearing EVs preferentially target to cells expressing Ptp10D. We  
36 used co-immunoprecipitation and peptide binding to show that the cytoplasmic domain (ICD) of  
37 Sas binds to dArc1. dArc1 and mammalian Arc are related to retrotransposon Gag proteins.  
38 They form virus-like capsids which encapsulate *Arc* and other mRNAs and are transported  
39 between cells via EVs. The Sas ICD contains a motif required for dArc1 binding that is shared  
40 by the mammalian and *Drosophila* amyloid precursor protein (APP) orthologs, and the Sas and  
41 APP ICDs also bind to mammalian Arc. Sas facilitates delivery of dArc1 capsids bearing *dArc1*  
42 mRNA into distant Ptp10D-expressing recipient cells *in vivo*.

43

44

## 45 INTRODUCTION

46 Extracellular vesicles (EVs) are mediators of cell-cell communication that transport specific  
47 protein and RNA cargoes. They are a heterogeneous collection of vesicular structures that are  
48 exported from cells by a variety of mechanisms. Exosomes are 30-150 nm in diameter and are  
49 released into cell supernatants *via* fusion of multivesicular bodies (MVBs) with the plasma  
50 membrane. Exosomes and other EVs carry specific proteins and RNAs, and EVs derived from  
51 different cell types contain different cargoes. EV cargoes are biomarkers for specific diseases.  
52 Because EVs can encapsulate RNAs and protect them from degradation, and then deliver those  
53 RNAs to recipient cells, they represent a promising new type of therapeutic agent(O'Brien et al.,  
54 2020; Teng and Fussenegger, 2020).

55

56 While the biogenesis of EVs is comparatively well understood, much less is known about  
57 mechanisms involved in their targeting to specific cell types. EVs can directly activate  
58 intracellular signaling by interacting with cell surface receptors. They are internalized into cells  
59 after receptor binding using a variety of endocytic mechanisms, resulting in the delivery of their  
60 cargoes into the recipient cells. In this paper, we identify Stranded at second (Sas), a large  
61 *Drosophila* cell surface protein (CSP)(Schonbaum et al., 1992), as an EV targeting ligand. Sas  
62 has an extracellular domain (ECD) containing a signal peptide, a unique N-terminal region, four  
63 von Willebrand factor C (VWFC) domains, and three Fibronectin Type III (FN-III) repeats (Fig.  
64 1a). It has a single transmembrane (TM) domain and a short (37 amino acids (aa)) cytoplasmic  
65 domain (ICD). Sas is commonly used as a marker for the apical surfaces of epithelially-derived  
66 cells, including tracheal cells in the respiratory system. *sas* mutant larvae die at or before  
67 second instar (hence the name stranded at second, which is derived from baseball terminology)  
68 and have tracheal phenotypes(Schonbaum *et al.*, 1992). A tyrosine motif in the Sas ICD binds  
69 to the PTB domain of Numb(Chien et al., 1998), an endocytic protein that is a negative regulator

70 of Notch. Sas has no mammalian orthologs, but there are many mammalian CSPs that contain  
71 VWFC and FN-III domains.

72

73 We identified the receptor tyrosine phosphatase (RTP) Ptp10D as a binding partner for Sas,  
74 and showed that Sas::Ptp10D interactions regulate embryonic axon guidance, as well as glial  
75 migration and proliferation(Lee et al., 2013). Ptp10D is one of the two *Drosophila* R3 subfamily  
76 RTPs, which have ECDs composed of long chains of FN-III repeats. Sas::Ptp10D interactions  
77 also control the elimination of neoplastic epithelial clones by surrounding normal tissue. Sas is  
78 on normal epithelial cells, and it relocalizes to the parts of their cell surfaces that are adjacent to  
79 the neoplastic clone and binds to Ptp10D on the neoplastic cells. Ptp10D in turn relocalizes and  
80 dephosphorylates the EGF receptor tyrosine kinase, leading to death of the neoplastic  
81 cells(Yamamoto et al., 2017). The Sas ECD probably has other binding partners as well,  
82 because it interacts with cells that do not express Ptp10D in live embryo staining assays(Lee *et*  
83 *al.*, 2013).

84

85 Sas localizes to EVs, as demonstrated by immuno-electron microscopy (immuno-EM) and  
86 Western blotting of EV preparations. These EVs preferentially target to cells expressing Ptp10D,  
87 and expression of Numb further increases incorporation of EV contents into recipient cell  
88 lysates. We used mass spectrometry to identify proteins associated with Sas in EVs, and found  
89 that dArc1 is the most highly enriched protein. We then used co-immunoprecipitation (co-IP)  
90 and peptide binding to show that dArc1 binds directly to the short Sas ICD.

91

92 Arc was originally identified in mammals as a locally translated dendritic protein that regulates  
93 synaptic plasticity, in part by modulating endocytosis of AMPA receptors(Chowdhury et al.,  
94 2006; Shepherd et al., 2006). The *Drosophila* genome encodes two Arc-related proteins, dArc1  
95 and dArc2. The *dArc2* gene, which encodes a truncated protein, was likely generated by a gene

96 duplication, and the *dArc1* and *dArc2* genes are adjacent(Mattaliano et al., 2007). *dArc1*  
97 functions in larval and adult brain neurons to regulate aspects of metabolism(Keith et al., 2021;  
98 Mattaliano *et al.*, 2007; Mosher et al., 2015). *Arc* and *dArc1* evolved independently from  
99 retrotransposon Gag proteins(Shepherd, 2018). Remarkably, they were both recently shown to  
100 form virus-like capsids that can encapsulate *Arc* mRNAs and are transported between cells via  
101 EVs(Ashley et al., 2018; Hantak et al., 2021; Pastuzyn et al., 2018). *dArc1*, but not *dArc2*, has a  
102 C-terminal Zn<sup>2+</sup> finger that might be involved in nucleic acid binding(Erlendsson et al., 2020;  
103 Pastuzyn *et al.*, 2018). Mammalian *Arc* lacks Zn<sup>2+</sup> fingers, but RNA is required for normal capsid  
104 assembly(Pastuzyn *et al.*, 2018). *Drosophila* *dArc1* capsids bearing *dArc1* mRNA move from  
105 neurons to muscles across larval neuromuscular junction (NMJ) synapses, and *dArc1* transfer is  
106 required for activity-induced induction of morphological synaptic plasticity(Ashley *et al.*, 2018).  
107  
108 The short Sas ICD contains a tyrosine motif required for *dArc1* binding. Appl, the ortholog of  
109 amyloid precursor protein (APP), is the only other *Drosophila* CSP that shares this motif, and its  
110 ICD also binds to *dArc1*. The motif is conserved in human APP, and the APP and Sas ICDs also  
111 bind to mammalian *Arc*. The interaction between APP and *Arc* is of interest because several  
112 studies have implicated *Arc* in control of  $\beta$ -amyloid accumulation and Alzheimer's disease  
113 (AD)(Bi et al., 2018; Landgren et al., 2012; Wu et al., 2011), and APP also localizes to  
114 EVs(Laulagnier et al., 2018; Perez-Gonzalez et al., 2020).  
115  
116 To determine whether Sas can target *dArc1* to Ptp10D-expressing recipient cells *in vivo*, we  
117 expressed *dArc1* with and without Sas in embryonic salivary glands (SGs). We observed that  
118 expression of *dArc1* protein from a cDNA construct induces expression of the endogenous  
119 *dArc1* gene in SGs. When Sas and *dArc1* are expressed together in SGs, high levels of  
120 endogenous *dArc1* mRNA appear in distant tracheal cells, which express Ptp10D. The data  
121 suggest that Sas EVs bearing *dArc1* capsids that contain *dArc1* mRNA travel within the embryo

122 and are internalized into tracheal cells, which then also turn on expression of the endogenous  
123 *dArc1* gene.

124

125

## 126 **RESULTS AND DISCUSSION**

### 127 **Sas is an EV targeting ligand**

128 Sas exists as two isoforms generated by alternative splicing. Full-length Sas (PB/PD isoform,  
129 denoted here as Sas<sup>FL</sup>) is a 1693 aa protein. It contains a 345 aa region (EVT) between the  
130 VWFC and FN-III domains that is lacking in the PA/PC isoform (Sas<sup>short</sup>)(Fig. 1a). We expressed  
131 Sas<sup>FL</sup> tagged with an N-terminal V5 epitope tag (inserted immediately after the signal sequence)  
132 in embryonic late stage 16 Apterous (Ap) neurons, which consist of paired neurons (one per  
133 hemisegment) in the ventral nerve cord (VNC) and scattered neurons in the brain lobes. We  
134 noted that V5-Sas<sup>FL</sup> moved away from the expressing cells and accumulated in sheaths around  
135 brain lobes and around axons in the VNC, as well as in puncta throughout the VNC and brain  
136 (Fig. 1b). This was surprising, since Sas<sup>FL</sup> is a transmembrane CSP. It was expressed together  
137 with mCD8-GFP, which is also a transmembrane CSP, and the GFP signal was restricted to the  
138 Ap neuron cell bodies, with faint staining on the axons (Fig. 1b).

139  
140 Movement of V5-Sas<sup>FL</sup>, and presumably of endogenous Sas<sup>FL</sup>, away from its source could occur  
141 through cleavage of the Sas ECD from the cell surface or by release of intact Sas in EVs. To  
142 distinguish between these possibilities, we expressed V5-tagged Sas<sup>FL</sup> and Sas<sup>short</sup> in  
143 *Drosophila* Schneider 2 (S2) cells in culture, prepared EVs from cell supernatants using the  
144 Invitrogen Exosome Isolation Kit, and analyzed their contents by Western blotting. EV  
145 preparations generated with this kit have been shown to have similar characteristics to those  
146 generated by ultracentrifugation(Skottvoll et al., 2019). Both preparations contain primarily  
147 exosomal proteins. However, they also contain similar levels of proteins annotated as  
148 components of other compartments, especially nuclear proteins. Thus, both methods should be  
149 regarded as enrichments rather than purifications. The kit has the advantage of requiring much  
150 less material, making it suitable for generation of EVs from small populations of transfected  
151 cells. EVs generated from S2 cells contain the Evi protein, which is a commonly used EV

152 marker. Evi is also present in cell lysates, however. The EV preparations lack  $\beta$ -actin, showing  
153 that they are not heavily contaminated by cytosol (Fig. 1c). We found that most of the V5-Sas<sup>FL</sup>  
154 localized to EVs, while V5-Sas<sup>short</sup> was retained in the cell lysate (Fig. 1c). We did not observe  
155 any proteolytic cleavage products in EVs or unpurified supernatants. Endogenous Sas is  
156 expressed at almost undetectable levels in S2 cells.

157

158 The commonly used rabbit antiserum against Sas primarily recognizes the EVT region, so cell  
159 staining reveals the localization of Sas<sup>FL</sup>. (Schonbaum *et al.*, 1992) To visualize Sas<sup>short</sup>, we  
160 made an anti-peptide antibody against a sequence spanning an exon junction in the PA/PC  
161 isoforms. This selectively recognizes Sas<sup>short</sup> (Supp. Fig. 1). Double-staining of the foregut and  
162 hindgut with the two Sas antibodies shows that Sas<sup>FL</sup> localizes to apical cell surfaces, while  
163 Sas<sup>short</sup> is distributed across the entire cell membrane (Fig. 1d). These data imply that the EVT  
164 sequence lacking in Sas<sup>short</sup> is required for both apical localization and targeting to EVs.  
165 Polarized cells can release EVs with different cargoes from their apical and basolateral  
166 surfaces (Matsui *et al.*, 2021), so EV targeting could be downstream of apical localization *in vivo*.  
167 S2 cells are unpolarized, however, so this mechanism is unlikely to apply to localization of Sas<sup>FL</sup>  
168 to EVs in cultured S2s.

169



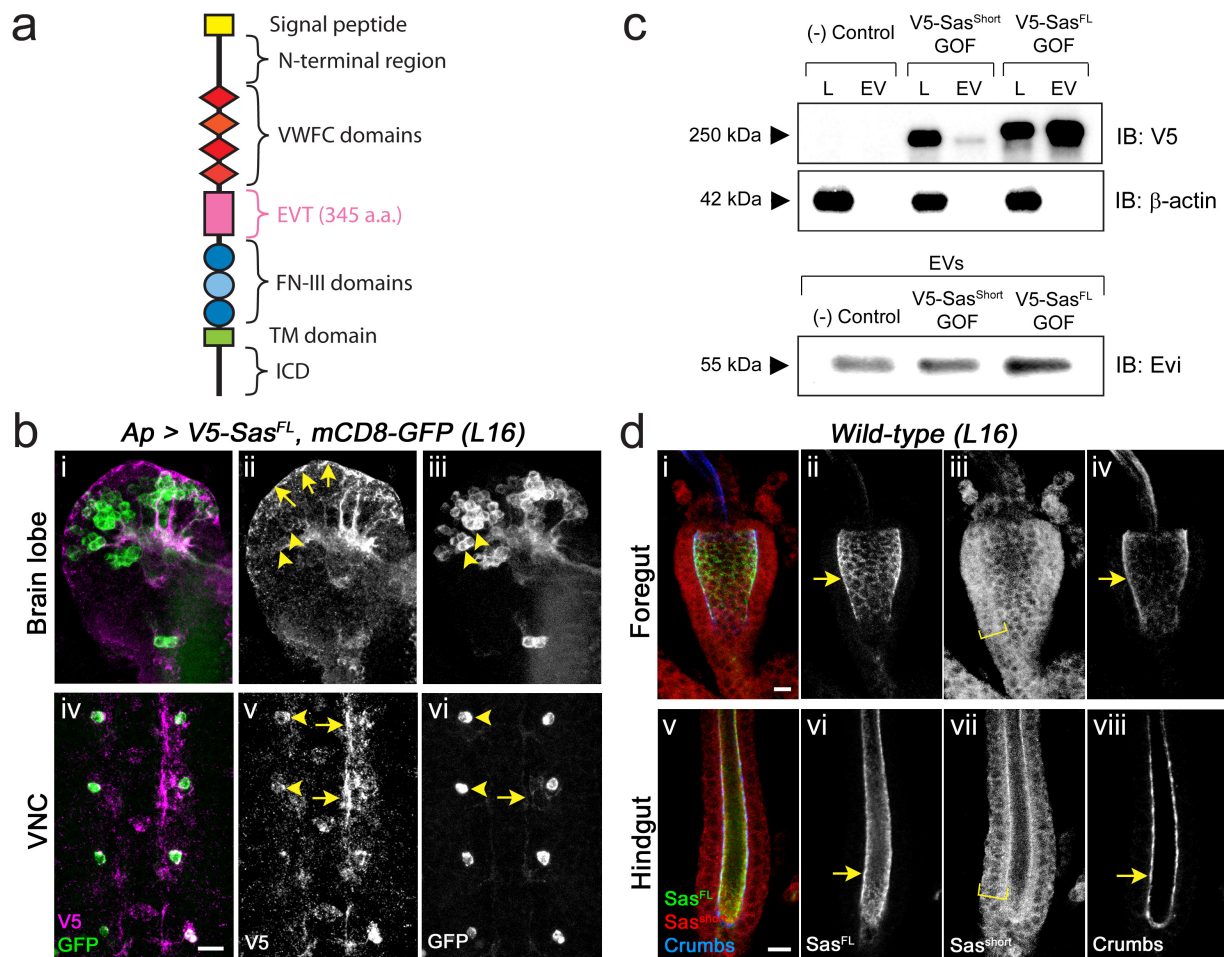

170

171 **Fig. 1. Localization of Sas isoforms.** **a**, schematic diagram of the Sas<sup>FL</sup> protein. The Sas<sup>short</sup>  
 172 isoform lacks the EVT region. **b**, Sas<sup>FL</sup> moves away from expressing cells. V5-Sas<sup>FL</sup> was  
 173 expressed together with mCD8-GFP (transmembrane CSP) in Apterous neurons in late stage  
 174 16 embryos. **i,iv**: double-labeling (V5, magenta; GFP, green); **ii, v**: V5 channel; **iii, vi**: GFP  
 175 channel. **i-iii**, brain lobes. GFP labels cell bodies (arrowheads in **iii**) and axon tracts. V5 labels  
 176 cell bodies only weakly (arrowheads in **ii**), strongly labels some axon tracts, and localizes to the  
 177 periphery (sheath) of the brain lobes (arrows in **ii**). **iv-vi**, ventral nerve cord. GFP strongly labels  
 178 Ap VNC cell bodies (arrowheads in **vi**) and weakly labels Ap axons (arrow in **vi**). V5 weakly  
 179 labels cell bodies (arrowheads in **v**), and strongly labels segments of axons (arrows in **v**). Note  
 180 that V5 staining appears thicker than GFP staining, suggesting that it represents glial sheaths

181 surrounding the axon tracts. Scale bar, 10  $\mu$ m. **c**, Western blot, showing that Sas<sup>FL</sup> localizes to  
182 EVs. EVs were prepared from cell supernatants, and equal amounts of cell lysate proteins and  
183 EV proteins were loaded on the gel. GOF (gain of function): the indicated protein is  
184 overexpressed. Top panel, anti-V5 blot. Sas<sup>FL</sup> migrates slightly above the 250 kD marker, and  
185 Sas<sup>short</sup> slightly below it. Middle panel, anti- $\beta$ -actin (cytoplasmic marker) blot. Note that there is  
186 more Sas<sup>FL</sup> in EVs than in the lysate, while almost all Sas<sup>short</sup> is in lysate. The absence of  $\beta$ -actin  
187 signal in the EVs shows that they are not heavily contaminated by cytosol. Bottom panel, Evi  
188 (EV marker), in EV preps. **d**, Localization of endogenous Sas isoforms in the embryonic gut.  
189 *Wild-type* late stage 16 embryos were triple-stained for Sas<sup>FL</sup> (using the (Schonbaum *et al.*,  
190 1992) antiserum, which primarily recognizes the EVT region; green), Sas<sup>short</sup> (using our  
191 antipeptide antibody; red), and Crumbs (apical marker; blue). **i-iv**, foregut; **v-viii**, hindgut. Note  
192 that in both gut regions Sas<sup>FL</sup> colocalizes with Crumbs at the apical (luminal) cell surfaces  
193 (arrows), while anti-Sas<sup>short</sup> labels the entire width of the gut wall (brackets). See Supp. Fig. 1 for  
194 images of anti-Sas<sup>short</sup> staining of wild-type and *sas* mutant embryos, demonstrating antibody  
195 specificity. Scale bar in **d-i**, 20  $\mu$ m; in **d-v**, 10  $\mu$ m. Source data files include raw and labelled  
196 images for the Western blots shown in panel c.  
197

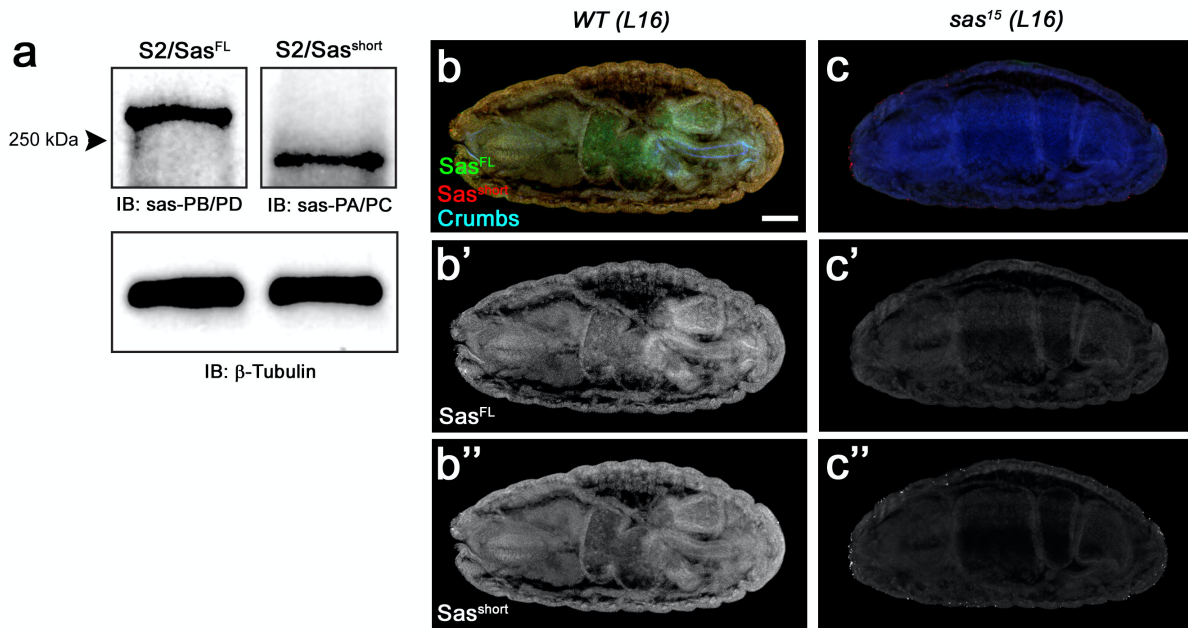

198

199 **Supp. Fig. 1. Recognition of Sas isoforms by anti-Sas antibodies.**

200 **a**, Western blot of S2 cell lysates with antibodies against Sas<sup>FL</sup> (Sas-PB/PD)(Schonbaum *et al.*,  
201 1992) and Sas<sup>short</sup> (Sas PA/PC) (see Materials and Methods). Left, S2 cells expressing Sas<sup>FL</sup>;  
202 right, S2 cells expressing Sas<sup>short</sup>. Anti-Sas-PB/PD recognizes a band of >250 kD, while anti-  
203 Sas-PA/PC recognizes a smaller band. **b,c**, late stage 16 *wild-type* (**b**) and *sas*<sup>15</sup> (null mutant)  
204 (**c**) whole embryos, triple-stained with anti-Sas<sup>FL</sup>, anti-Sas<sup>short</sup>, and anti-Crumbs. **b'**, **c'** show the  
205 anti-Sas<sup>FL</sup> channel only, and **b''**, **c''** show the anti-Sas<sup>short</sup> channel. Note that there is no  
206 detectable staining of the *sas* mutant embryo with either antibody, showing that the anti-Sas<sup>short</sup>  
207 antibody recognizes Sas *in vivo* and does not detectably cross-react with other proteins (**c'**, **c''**).  
208 Scale bar, 50  $\mu$ m. Source data files include raw and labelled images for the Western blots  
209 shown in panel a.

210

211

## 212 **Analysis of Sas<sup>FL</sup> EVs by electron microscopy**

213 To demonstrate that Sas is actually on EVs, we used immuno-EM and EM tomography to  
214 analyze purified EV preparations from V5-Sas<sup>FL</sup>-expressing S2 cells. The tomographic images  
215 show that the EVs span a range of sizes, from ~30 nm in diameter to >100 nm, and that they  
216 are a mixture of single and double-membrane vesicles (Fig. 2c, Supp. Figs. 2a, d). For immuno-  
217 EM, we incubated EVs with anti-V5, followed by gold-labeled anti-mouse secondary antibody.  
218 Fig. 2a shows a typical image, in which an EV is associated with multiple 10 nm gold particles.  
219 The distance between the EV membrane (yellow bracket: diameter of the vesicle) and a gold  
220 particle (white bracket: distance between membrane and a particle) varies, but can be more  
221 than 40 nm. This likely reflects the large size of the Sas ECD, in which the N-terminal V5  
222 epitope is separated by 1590 aa from the TM domain. The region outside of the membrane  
223 boundary is of higher density, probably because it represents the protein sheath around the EV  
224 membrane. To further characterize Sas localization, we then performed an experiment in which  
225 EVs were incubated with both mouse anti-V5 and rabbit anti-Sas, which primarily recognizes the  
226 EVT region in the middle of the ECD, followed by 10 nm gold particle-labeled anti-mouse  
227 secondary antibody and 5 nm gold particle-labeled anti-rabbit secondary antibody. Fig. 2b  
228 shows an EV that is associated with multiple 10 nm (arrow) and 5 nm (arrowhead) gold  
229 particles.

230

231 To analyze the numbers and sizes of EVs from Sas<sup>FL</sup>-expressing and control S2s, we examined  
232 purified EVs using Nanoparticle Tracking Analysis (NTA, System Biosciences, LLC). We  
233 observed that the distribution of EV diameters is shifted toward smaller values in the cells  
234 expressing Sas<sup>FL</sup> (mean diameter=102 nm vs. 129 nm for control cells) (Fig. 2e). The mode  
235 (most frequently observed EV size) in the Sas<sup>FL</sup> cells is about 70 nm, which is consistent with  
236 the diameters of many of the EVs we observed by EM tomography (Supp. Fig. 2). Expression of  
237 Sas<sup>FL</sup> increased the number of EVs per cell in the exosome size range (30-160 nm in diameter)

238 by 44%, and the number of EVs per cell of <100 nm in diameter by 72%, suggesting that the  
239 presence of high levels of Sas<sup>FL</sup> increases the rate of EV production. This is consistent with a  
240 modest increase (~60%) in the intensity of the Evi (EV marker) signal from Sas<sup>FL</sup> expressing  
241 cells relative to control or Sas<sup>short</sup> expressing cells that was observed in the Western blot  
242 experiment of Fig. 1c.

243

244

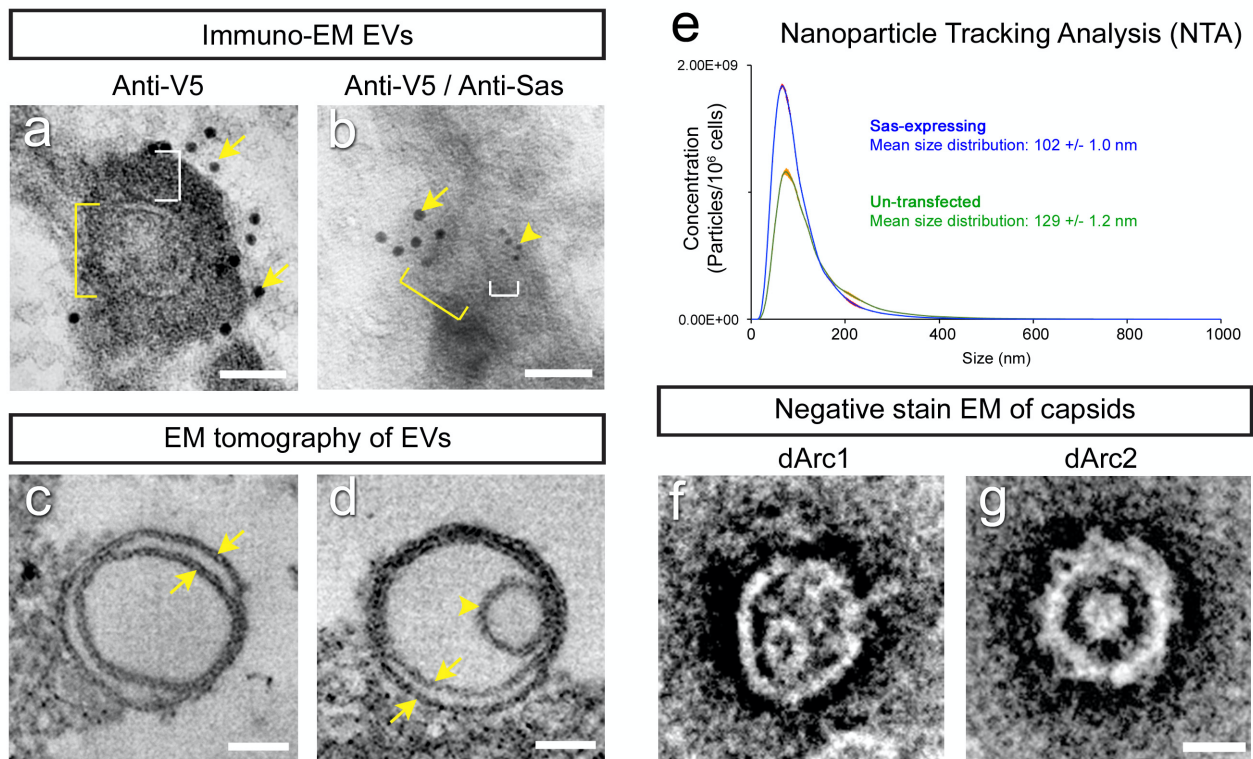

245

246 **Fig. 2. Analysis of EVs and capsids by electron microscopy and nanoparticle tracking**

247 **analysis. a, b,** Immuno-EM images of EVs from a purified EV prep from V5-Sas<sup>FL</sup>-expressing

248 S2 cells. EV outline (membrane) diameters are indicated by yellow brackets. White brackets,

249 separation between EV outline and a gold particle. **a,** immuno-EM with 10 nm anti-V5 gold

250 particles (arrows). **b,** immuno-EM with both 10 nm anti-V5 (large gold, arrow) and 5 nm anti-Sas

251 (small gold, arrowhead). **c,** EM tomogram of an empty double-membrane vesicle (arrows).

252 Apparent EV sizes differ between immuno-EM and tomography, which use very different

253 preparation methods. A low-mag view of a single slice from an EM tomogram of an EV

254 preparation is shown in Supp. Fig. 2. **d,** EM tomogram of a double-membrane vesicle (arrows)

255 with a capsid-sized denser object inside it (arrowhead). Video 1 shows a 3D reconstruction of

256 this EV. Empty and filled single-membrane EVs were also observed (Supp. Fig. 2). Scale bars

257 in **a-d,** 50 nm. **e,** Nanoparticle Tracking Analysis of purified EV preparations from untransfected

258 (green curve) and Sas<sup>FL</sup>-expressing (blue curve) S2 cells. The mean size distribution is

259 indicated. Standard error indicated by red color around curves. **f-g**, negative stain EMs of  
260 capsids from purified dArc1(**f**) and dArc2 (**g**) preparations from *E. coli*. Low-mag images of  
261 capsid preparations in Supp. Fig. 2. Scale bar in **f-g**, 20 nm. Source data files include an Excel  
262 file of raw data for the NTA analysis, the conversion of the numbers from numbers of EVs per  
263 sample to numbers of EVs per cell, based on cell counts, and plots of the data.

264

265

266

267

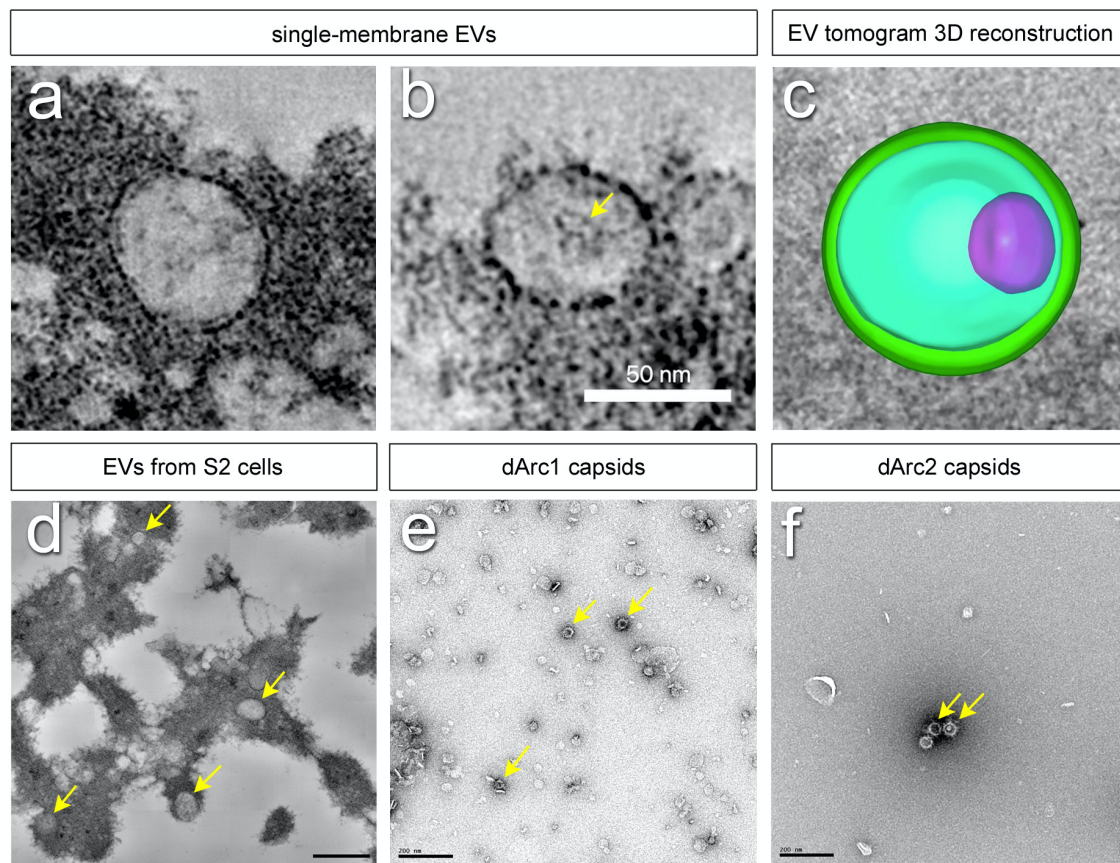

268

269

270 **Supp. Fig. 2. EM analysis of EVs from Sas<sup>FL</sup>-expressing S2 cells and dArc capsids. a,**  
271 **tomogram of an empty single-membrane EV. b, tomogram of a single-membrane EV enclosing**  
272 **a denser object (arrow). Scale bars in a-b, 50 nm. c, a still image from Video 1, which displays a**  
273 **reconstruction of the double-membrane EV from Fig. 2d. The denser object inside the EV is in**  
274 **magenta. d, a low-magnification image of a single slice from a tomogram, showing multiple EVs**  
275 **of various sizes (arrows). e, a low-magnification image of purified dArc1 capsids (arrows). f, a**  
276 **low-magnification image of purified dArc2 capsids (arrows). Scale bars in d-f, 200 nm.**

277

278

279



280 **Sas<sup>FL</sup> EVs target to cells expressing Ptp10D**

281 Having shown that Sas<sup>FL</sup> moves away from expressing neurons in the embryo and is an EV  
282 component, we then asked whether it can be incorporated into distant cells *in vivo*, presumably  
283 through endocytosis of EVs. We expressed V5-Sas<sup>FL</sup> in 3<sup>rd</sup> instar larval salivary glands (SGs)  
284 using an SG-specific GAL4 driver, *Sage-GAL4*, and visualized V5 staining in other tissues. We  
285 found that V5-Sas<sup>FL</sup> made in SGs is present in imaginal discs, which are separated from SGs by  
286 larval hemolymph (Figs. 3a-b).

287

288 To examine mechanisms involved in specific targeting of Sas EVs, we added supernatants (EV  
289 fraction) from V5-Sas<sup>FL</sup>-expressing S2 cells to S2 cell cultures and analyzed recipient cell  
290 lysates by Western blotting. We observed that expression of the Sas receptor Ptp10D in  
291 recipient cells increased V5-Sas<sup>FL</sup> levels in these cells, as did expression of Numb, a regulator  
292 of endocytosis that binds to the Sas ICD(Chien *et al.*, 1998). Expression of both Ptp10D and  
293 Numb produced a synergistic effect, increasing V5-Sas<sup>FL</sup> by ~4-fold relative to untransfected  
294 recipient cells (Figs. 3f-g). We speculate that binding of Numb to the Sas ICD increases Sas  
295 uptake and/or protects endocytosed Sas from degradation.

296

297 We then developed an assay to examine the effects of Ptp10D and Numb on Sas targeting in  
298 larval cells by incubating dissected 3<sup>rd</sup> instar wing imaginal discs with V5-Sas<sup>FL</sup> supernatants.  
299 We expressed Ptp10D, or both Ptp10D and Numb, in wing discs using the *Ap-GAL4* driver. The  
300 control wing discs displayed weak V5 staining after incubation with V5-Sas<sup>FL</sup> EVs. Staining was  
301 increased by Ptp10D expression, and further elevated (~3-fold increase relative to *Ap-GAL4*  
302 control) by expression of both Ptp10D and Numb (Figs. 3c-e, g; Supp. Fig. 3).

303

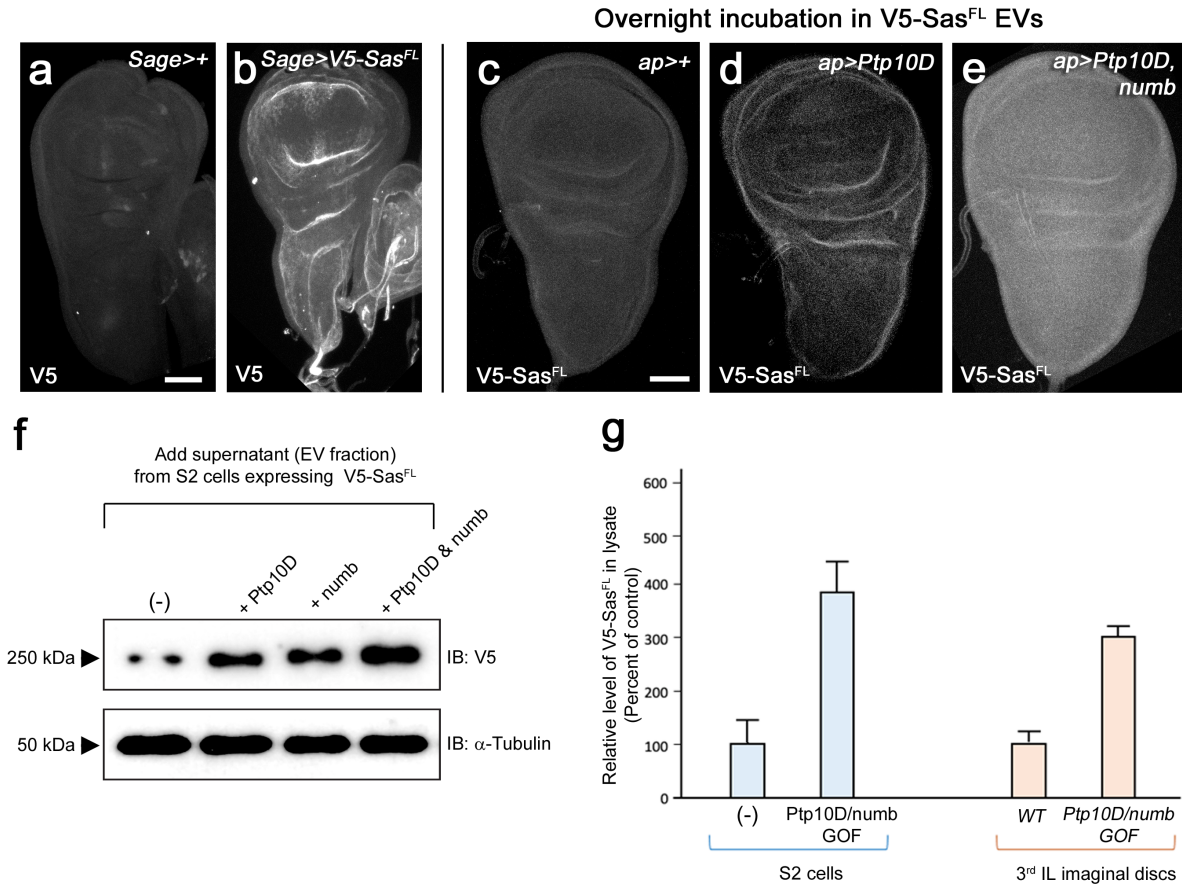

304

305 **Fig. 3. Transfer of Sas<sup>FL</sup> to recipient cells.** **a**, a third instar wing disc, with a portion of the  
306 haltere disc (right side), from a *Sage-GAL4/+* (SG-specific driver) larva, showing no V5 staining.  
307 **b**, a wing disc, with a portion of the haltere disc, from a *Sage>V5-Sas<sup>FL</sup>* larva, showing bright V5  
308 staining. Imaginal discs display no expression of GFP or mCherry reporters driven by *Sage-*  
309 *GAL4*. **c-e**, wing discs incubated with EVs from V5-Sas<sup>FL</sup>-expressing S2 cells and stained with  
310 anti-V5. For anti-Ptp10D and anti-Numb staining, see Supp. Fig. 3. **c**, *ap-GAL4/+*; **d**,  
311 *ap>Ptp10D*; **e**, *ap>Ptp10D + Numb*. **c**, low levels of anti-V5 staining are observed. **d**, higher  
312 levels are observed in disc folds, which also express Ptp10D (Supp. Fig. 3). **e**, bright anti-V5  
313 staining is observed throughout the disc. This pattern matches anti-Numb staining (Supp. Fig.  
314 3). Scale bars in **a** and **c**, 50  $\mu$ m. **f**, transfer of Sas<sup>FL</sup> from EVs into recipient S2 cells.  
315 Supernatants from S2 cells expressing V5-Sas<sup>FL</sup> were incubated with cultures of untransfected

316 S2 cells or cells expressing Ptp10D, Numb, or both, and cell lysates analyzed by Western  
317 blotting with anti-V5. Note that V5-Sas<sup>FL</sup> levels were elevated relative to control cells by  
318 expression of either Ptp10D or Numb, and that levels were further increased by coexpression of  
319 Ptp10D and Numb coexpression. **g**, quantitation of results from panels **c-e** and **f**. Levels of  
320 transferred V5-Sas<sup>FL</sup> were increased by ~4-fold relative to untransfected controls by Ptp10D +  
321 Numb coexpression in S2 cells, and by ~3-fold relative to ap-GAL4/+ control by Ptp10D + Numb  
322 coexpression in wing discs. Source data files include raw and labelled images for the Western  
323 blots shown in panel f, and an Excel file of the quantitation of the Western blot and disc  
324 immunofluorescence signals used to generate panel g.  
325  
326

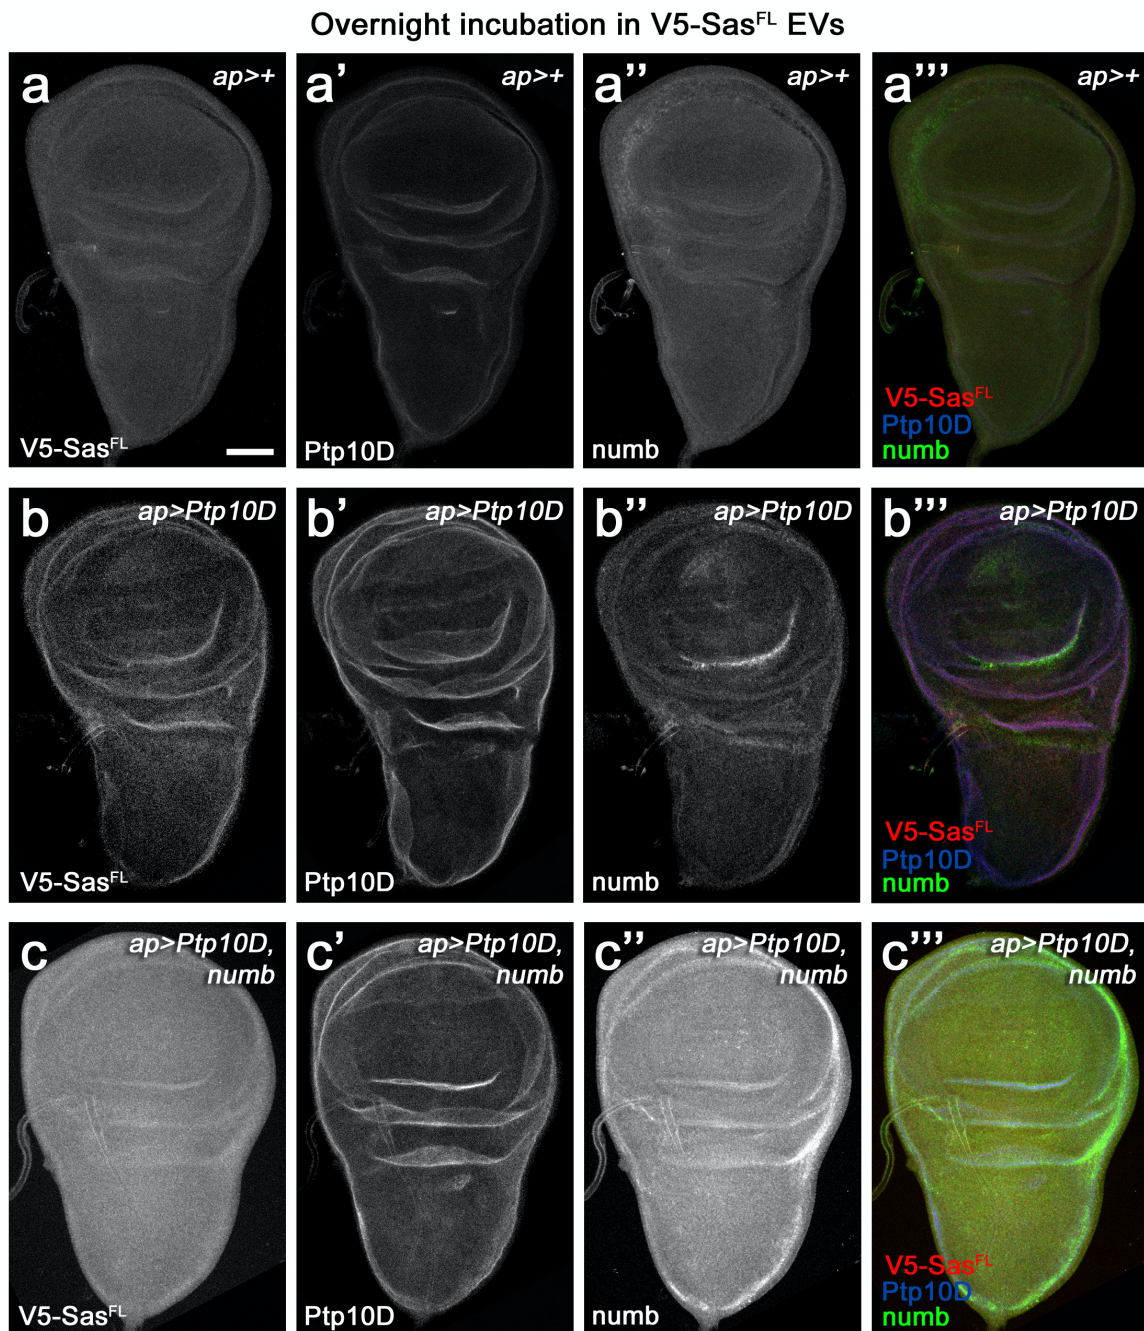

327

328 **Supp. Fig. 3. Visualization of all three channels of the triple-stained wing discs shown in**

329 **Fig. 3. a-c** show the anti-V5 channel, **a'-c'** the anti-Ptp10D channel, **a''-c''** the anti-Numb

330 channel, and **a'''-c'''** all three channels. When Numb is overexpressed, it labels the entire disc

331 (**c''**). Ptp10D localizes to cells in disc folds when overexpressed (**b'** and **c'**). These folds label

332 brightly with anti-V5 in **b**. Ap-GAL4 expresses GFP reporters in the dorsal  $\frac{3}{4}$  of the disc, but not  
333 in the ventral region. However, in discs incubated overnight with supernatant, we do not observe  
334 clear borders in the Numb and Ptp10D expression patterns.  
335

336 **Sas binds to dArc1 and mammalian Arc via a conserved tyrosine motif**

337 We then examined whether Sas interacts with specific EV cargoes. To do this, we made EV  
338 preparations from S2 cells expressing V5-Sas<sup>FL</sup> and from untransfected control cells, lysed them  
339 with nonionic detergent, incubated the lysates with anti-V5-coupled magnetic beads, and  
340 analyzed bead-bound proteins by mass spectrometry (Fig. 4a, Supp. Table 1). We ranked the  
341 identified proteins by their degree of enrichment in the V5-Sas<sup>FL</sup> samples relative to controls.  
342 Proteins that are present in the V5-Sas<sup>FL</sup> samples should include EV cargoes that bind to Sas<sup>FL</sup>  
343 and are therefore present in V5 IPs. Proteins in control samples would be those that  
344 nonspecifically bind to V5 beads. We observed that the most highly enriched protein (after Sas  
345 itself) is dArc1 (22-fold) (Fig. 4b). dArc2 is #7 on the list (6-fold). *dArc1* mRNA, presumably  
346 encapsulated within dArc1 capsids, is known to be a prominent mRNA component of EVs from  
347 *Drosophila* cultured cells(Ashley *et al.*, 2018; Lefebvre *et al.*, 2016). We then went on to show  
348 that dArc1 binds directly to the Sas ICD (see below).

349  
350 Other proteins within the top 7 included small ribonucleoproteins (SmE and SmF), a ribosomal  
351 protein (NHP2), and a collagen (Vkg). Proteins in these categories were found to be major EV  
352 components in a proteomic analysis of S2 and Kc167 EVs(Koppen *et al.*, 2011). We think it  
353 likely that some or all of these proteins are abundant contaminants that do not actually interact  
354 with Sas but happened to be present at higher levels in the IP from Sas-expressing cells vs. the  
355 IP from control cells. We did not further examine any of these proteins.

356  
357 EVs from media of short-term cultures of mouse cortical neurons were shown to contain denser  
358 objects whose size (~30 nm in diameter) was consistent with mammalian Arc capsids, and  
359 which were associated with anti-Arc gold particles(Pastuzyn *et al.*, 2018). For dArc1, capsid-like  
360 structures that bound to anti-dArc1 gold particles were detected in lysed preparations of EVs  
361 from S2 cells(Ashley *et al.*, 2018). We examined the EVs from Sas<sup>FL</sup>-expressing S2 cells EVs by

362 EM tomography, and were able to visualize denser objects within many of them (Fig. 2d, Supp.  
363 Fig. 2b). These were ~40 nm in diameter, consistent with the known dimensions of the dArc1  
364 capsid (37 nm)(Erlendsson *et al.*, 2020; Hallin *et al.*, 2021). A video of a 3D reconstruction of the  
365 EM tomogram of the EV in Fig. 2d is included (Video 1), and Supp. Fig.2c shows a still image  
366 from this video.

367

368 Since dArc1 was enriched in Sas<sup>FL</sup> preparations purified from EV lysates with anti-V5, we then  
369 investigated whether it binds to the Sas ICD (which would be in the EV interior) by co-IP in S2  
370 cells. We coexpressed Myc epitope-tagged dArc1 with a fusion protein in which the V5-tagged  
371 ECD of mouse CD8 was attached to the TM domain and the 37 aa ICD of Sas. We then IP'd  
372 cell lysates with anti-Myc, and detected V5-mCD8<sup>ECD</sup>-Sas<sup>TM-ICD</sup> by Western blotting. We  
373 observed that purified dArc1 co-IP'd with the Sas ICD fusion protein (Fig. 4d). We performed  
374 the same experiment for dArc2, but did not observe a consistent co-IP signal.

375

376 The Sas ICD sequence contains the sequence motif YDNPSY, which is a PTB-binding motif  
377 (NPXY) that overlaps by two amino acids with an SH2-binding motif (YXXP) that is also a  
378 potential Abl tyrosine kinase substrate sequence(Colicelli, 2010) (Fig. 4e). The NPXY motif is  
379 the target for binding of the Numb PTB(Li *et al.*, 1998). This suggests that an SH2 protein and a  
380 PTB protein might compete for binding to this sequence, if the first tyrosine was phosphorylated  
381 to create an SH2 docking site. The PTB domain of Numb does not require tyrosine  
382 phosphorylation to bind to its NPXY target. Interestingly, in an earlier mass spectrometric  
383 analysis, we found that the Shc protein, which contains a phosphotyrosine-binding SH2 domain,  
384 was associated with Sas purified from S2 cells treated with pervanadate to induce high-level  
385 tyrosine phosphorylation.

386

387 We searched for other *Drosophila* CSPs containing a sequence with similar properties in their  
388 ICDs, and found only one, Appl, which has the sequence YENPTY but is otherwise unrelated to  
389 the Sas ICD. Human APP, the mammalian ortholog of Appl, contains the same sequence in its  
390 short ICD (Fig. 4e), as do the two APP paralogs, APLP1 and APLP2. We then replaced the Sas  
391 ICD in the V5-mCD8<sup>ECD</sup>-Sas<sup>TM-ICD</sup> construct with the Appl and APP ICDs, and found that the  
392 Appl ICD protein co-IP'd with dArc1 (Fig. 4d), implicating the Y(D/E)NP(S/T)Y sequence in  
393 binding to dArc1. Interestingly, this sequence contains the consensus motif for binding of  
394 mammalian Arc to TARPγ2, CaMKII, and NMDA receptor peptides, which is X-P-X-  
395 (Y/F/H)(Nielsen et al., 2019; Zhang et al., 2015). Arc binds to the NMDA receptor as a  
396 monomer(Nielsen *et al.*, 2019). The TARPγ2 Arc-binding peptide is RIPSYP, which is similar to  
397 the sequences in Sas (PSYK) and APP (PTYK). Accordingly, we expressed Myc-tagged  
398 mammalian Arc (rArc<sup>FL</sup>) in S2 cells and examined whether it could co-IP with the V5-mCD8-ICD  
399 fusion proteins. We observed that Arc was able to co-IP with the Sas and APP ICDs (Fig. 4d).  
400 This is interesting, because mammalian and *Drosophila* Arc are not orthologs, and are  
401 apparently derived from independent Ty3/gypsy retrotransposon lineages(Ashley *et al.*, 2018;  
402 Hantak *et al.*, 2021; Pastuzyn *et al.*, 2018). The fact that both proteins mediate intercellular  
403 communication suggests that they may be products of convergent evolution. Fly and  
404 mammalian Arc appear to have evolved preferences for binding to similar peptide sequences.  
405  
406 The co-IP data indicate that the Sas ICD associates with dArc1 and Arc, but does not show that  
407 the two proteins directly interact. To evaluate this, we made the complete Sas, APP, and Appl  
408 ICDs (Fig. 4e), as well as a scrambled version of the Sas ICD and a deletion mutant of the Sas  
409 ICD that lacks the YDNPSY sequence, as biotinylated peptides, and bound these to  
410 streptavidin-coupled magnetic beads. To make purified Arc proteins for binding, we expressed  
411 dArc1, dArc2, and mammalian Arc as GST fusion proteins in *E. coli*. To evaluate the properties  
412 of these proteins, we cleaved off the GST after purification to facilitate capsid formation(Nielsen



413 *et al.*, 2019) and visualized the preparations by negative-stain EM. The dArc1 and dArc2  
414 preparations contained ~40 nm diameter capsids that appeared similar to those observed in  
415 previous studies(Ashley *et al.*, 2018; Erlendsson *et al.*, 2020; Pastuzyn *et al.*, 2018) (Figs. 2f-g).

416

417 We then mixed the beads with purified GST-dArc1, GST-rArc<sup>FL</sup>, and GST-dArc2 proteins and  
418 examined whether we could observe specific binding. As a positive control, we made purified  
419 Numb PTB domain, and showed that it bound as expected to the Sas, APP, and Appl peptides,  
420 which all contain the NPXY PTB-binding motif, but not to the scrambled Sas peptide or the  
421 YDNPSY deletion mutant. In the peptide binding assay, we observed that dArc1 directly bound  
422 to the wild-type (wt) Sas ICD sequence, but not to the other peptides. Mammalian Arc also  
423 bound to the wt Sas ICD, as well as to the APP ICD (Fig. 4e). GST-dArc2 did not bind  
424 specifically to any peptides.

425

426 These results implicate the Y(D/E)NP(S/T)Y sequence as a determinant of binding to Arcs (Fig.  
427 4e). The data suggest that APP might be a CSP that has a relationship to Arc which is similar to  
428 that of Sas to dArc1. This will be of interest to explore in future studies, especially since Arc has  
429 been implicated in AD pathogenesis(Bi *et al.*, 2018; Landgren *et al.*, 2012; Wu *et al.*, 2011). The  
430 first Y in the YENPTY motif in APP has been reported to be a substrate for the Abl tyrosine  
431 kinase(Zambrano *et al.*, 2001). If YENP was phosphorylated, it would become a docking site for  
432 a class of SH2 domain proteins, and binding of this protein(s) could occlude Arc binding to the  
433 adjacent PTYK sequence. The Abl inhibitor imatinib (Gleevec), which would be expected to  
434 block phosphorylation of this site, inhibits formation of  $\beta$ -amyloid peptide (A $\beta$ )(Netzer *et al.*,  
435 2003), and binding of Arc to APP could be relevant to this effect.

436

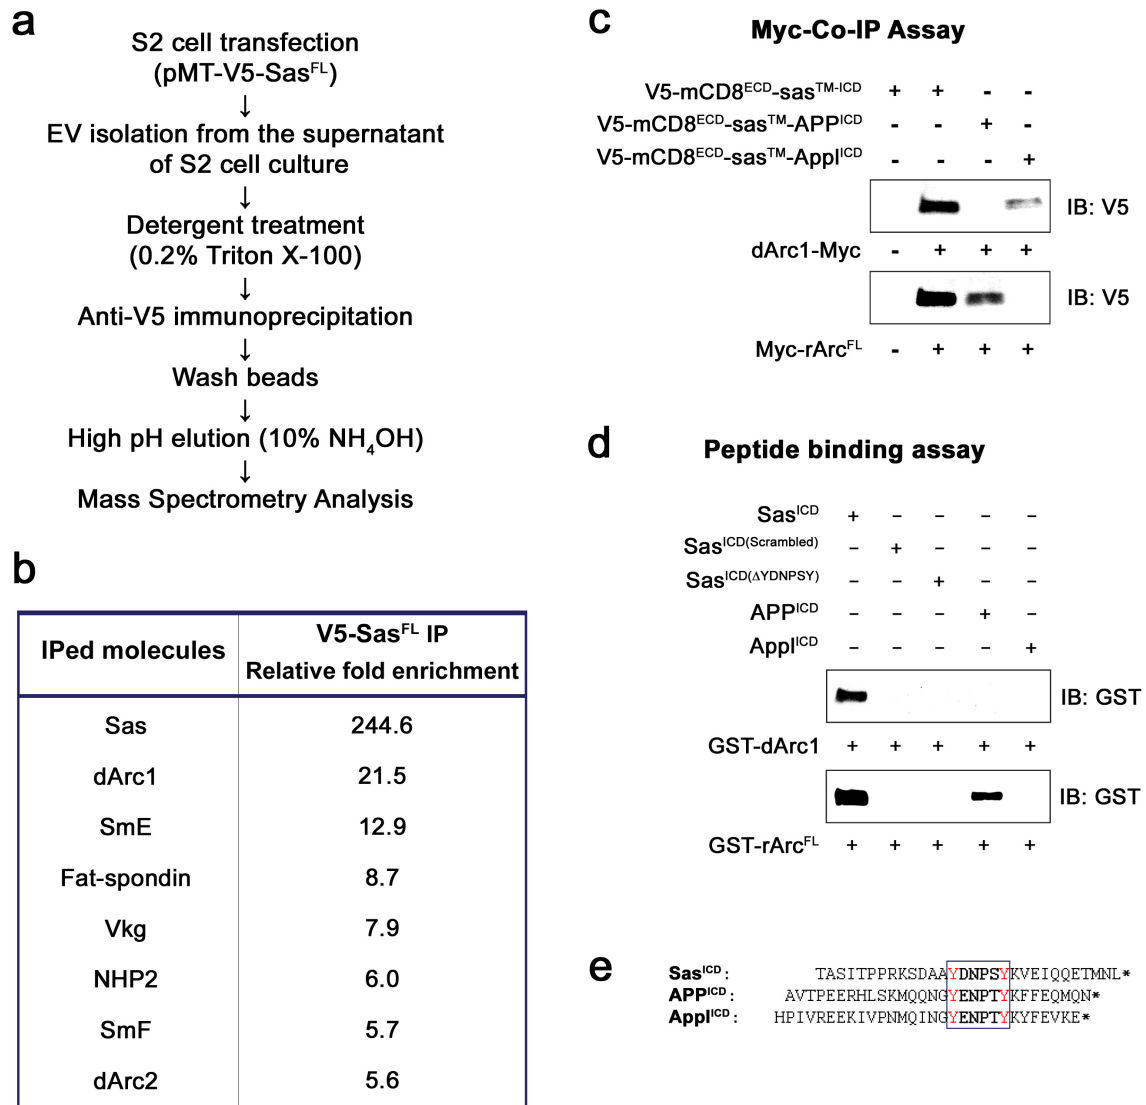

437

438 **Fig. 4. Interactions of Sas, Appl, and APP with Arcs.** **a**, protocol for mass spectrometry  
 439 analysis. Purified EVs from control S2 cells or S2 cells expressing V5-Sas<sup>FL</sup> were lysed and IP'd  
 440 with anti-V5, followed by protease digestion and mass spectrometry analysis. **b**, mass  
 441 spectrometry results. The 7 proteins present at the highest levels in IPs from V5-Sas<sup>FL</sup> EVs  
 442 relative to IPs from control EVs (> 6-fold ratio) are listed. Sas itself was the most highly enriched  
 443 protein, as expected. dArc1 and dArc2 were enriched by 22-fold and 6-fold, respectively. **c**, co-  
 444 IP/Western blot analysis of association between Sas and Arc fusion proteins in transfected S2

445 cells. S2 cells were transfected with the V5-mCD8<sup>ECD</sup>-Sas<sup>TM-ICD</sup> fusion protein construct, or with  
446 equivalent constructs in which the Sas ICD was replaced by the Appl or APP ICD, with or  
447 without Myc-tagged dArc1 or mammalian (rat) Arc (rArc<sup>FL</sup>) constructs. Lysates were IP'd with  
448 anti-Myc and blotted with anti-V5. Anti-V5 bands of the correct size were observed when dArc1  
449 was expressed with Sas or Appl ICD constructs, and when rArc<sup>FL</sup> was expressed together with  
450 Sas or APP ICD constructs. **e**, direct binding of purified GST-dArc1 and GST-rArc<sup>FL</sup> fusion  
451 proteins to Sas, APP, and Appl ICD peptides. Biotinylated peptides were bound to streptavidin  
452 magnetic beads, which were incubated with GST-Arc proteins, followed by Western blotting of  
453 bead-bound proteins with anti-GST. dArc1 bound to the wild-type, but not to scrambled or  
454 YDNPSY deletion mutant Sas ICD peptides, while rArc<sup>FL</sup> bound to wild-type Sas and APP ICD  
455 peptides. **f**, sequences of the complete Sas, APP, and Appl ICDs, corresponding to biotinylated  
456 peptide sequences. The conserved tyrosine motif is boxed, with tyrosines in red. \*, stop codons.  
457

458 **Sas facilitates intercellular transfer of dArc1 and its mRNA *in vivo***

459 Sas is not required for loading of dArc1 capsids into EVs, since *dArc1* mRNA is a normal  
460 component of EVs from cell lines that do not express Sas. If it behaves like mammalian Arc in  
461 its interactions with peptides(Nielsen *et al.*, 2019), dArc1 might bind to Sas as a monomer.  
462 Perhaps Sas recruits dArc1 monomers (possibly bound to mRNA *via* their Zn<sup>2+</sup> fingers) to  
463 nascent EVs during their biogenesis, and they then assemble into capsids. Binding of Sas to  
464 dArc1 may help to increase the probability that Sas-bearing EVs contain dArc1 capsids. The  
465 function of Sas would then be to deliver the EVs and their dArc1 capsid cargo to specific  
466 recipient cells.

467

468 Having shown that Sas<sup>FL</sup> can move within larvae and that it binds to dArc1, which is a known  
469 component of EVs that mediates intercellular communication, we then examined whether it can  
470 cause dArc1 to move from source cells into recipient cells *in vivo*. To establish an assay system  
471 for dArc1 capsid movement, we first expressed V5-Sas<sup>FL</sup> in late stage 16 embryonic SGs  
472 together with RFP, and observed that V5 signal moved to the gut and tracheae, while RFP was  
473 retained in the SGs as expected (Figs. 5a-b).

474

475 To examine dArc1 transport, we needed to express untagged dArc1 and visualize it with  
476 antibody against dArc1(Ashley *et al.*, 2018), because we were unsuccessful in detecting  
477 movement of tagged versions of dArc1. dArc1 is made at very low levels in embryos. In late  
478 stage 16 control embryos (*Sage-GAL4/+*), we observed faint ubiquitous staining, with higher  
479 levels in the gut. The same pattern was observed when Sas<sup>FL</sup> alone was expressed in SGs,  
480 although gut staining was slightly increased (Figs. 5c', 5e'). We then expressed dArc1 from a  
481 UAS construct that contained only the dArc1 open reading frame (ORF), flanked by  
482 heterologous 5' and 3' UTR sequences. The short 3' UTR was derived from SV40. When we  
483 expressed dArc1 alone in SGs, we observed bright anti-dArc1 staining in the SGs and

484 increased staining relative to controls in the gut and in dots in the body wall (Fig. 5d').

485 Expression of both Sas<sup>FL</sup> and dArc1 produced a larger increase in dArc1 staining in the gut and

486 peripheral dots (Fig. 5f').

487

488 To localize dArc1 staining in the body wall and compare it to Ptp10D staining, we examined

489 dissected “fillets” at high magnification. For reference, Supp. Figs. 4a-d show the evolution of

490 Ptp10D expression from stage 14 to late stage 16. VNC expression continuously increases

491 during this time period, while tracheal expression begins in stage 14, decreases in stage 15,

492 and re-emerges at stage 16, at which time Ptp10D is expressed in the main tracheal trunk and

493 major tracheal branches. Fig. 4j' shows that, in late stage 16 embryos expressing both Sas<sup>FL</sup>

494 and dArc1 in SGs, there were many bright puncta stained with anti-dArc1 in the dorsal tracheal

495 trunk, which expresses Ptp10D. These puncta appeared similar to those previously observed at

496 larval NMJs (Ashley *et al.*, 2018). They were not detectable in control embryos (*Sage-GAL4/+*).

497

498 There are lower numbers of fainter dArc1 puncta in tracheal trunks of the two other genotypes

499 (*Sage>dArc1* and *Sage>Sas<sup>FL</sup>*) (Figs. 5h', i'). Endogenous Sas is expressed at low levels in

500 SGs, and endogenous *dArc1* mRNA is also present in SGs (Fig. 5k), although dArc1 protein is

501 not detectable. Endogenous Sas<sup>FL</sup> may be able to transport some of the overexpressed dArc1,

502 and overexpressed Sas<sup>FL</sup> might transport some endogenous dArc1, giving rise to the observed

503 puncta. It is also interesting that dArc1 (and *dArc1* mRNA; see below) is observed in tracheal

504 cells, but not in VNC neurons, which also express Ptp10D at high levels. There is a glial sheath

505 around the VNC at late stage 16, and this might block access of EVs to Ptp10D-expressing

506 neurons. Alternatively, perhaps there are cofactors required for EV binding and/or internalization

507 that are not expressed in neurons.

508

509 More dramatic effects of Sas<sup>FL</sup> on dArc1 capsid movement were observed when endogenous  
510 *dArc1* mRNA was examined by fluorescence *in situ* hybridization (FISH). To detect mRNA, we  
511 used the 700 nt antisense 3' UTR probe employed in the (Ashley *et al.*, 2018) paper to visualize  
512 *dArc1* mRNA puncta at the NMJ. Note that this probe does not recognize overexpressed *dArc1*  
513 mRNA made from the UAS construct, because that contains only the dArc1 ORF and no *dArc1*  
514 3' UTR sequences. In late stage 16 control embryos (*Sage-GAL4/+*), we observed faint FISH  
515 signals in the SGs and a few puncta elsewhere in the embryo (Fig. 5k). A similar pattern was  
516 seen in *Sage>Sas<sup>FL</sup>* embryos (Fig. 5m). However, when dArc1 was expressed from the UAS-  
517 dArc1 ORF construct, we observed bright FISH signals in SGs with the 3' UTR probe (Fig. 5l).  
518 There were also scattered puncta in other parts of the embryos. This shows that exogenous  
519 dArc1 induces expression of endogenous *dArc1* mRNA (or stabilizes the mRNA). No signal was  
520 observed when a sense *dArc1* probe was used for FISH (Supp. Figs. 4e-h). Finally, when Sas<sup>FL</sup>  
521 and dArc1 were expressed together, we observed a completely different pattern, in which the  
522 entire tracheal system is lit up by the FISH signal (Fig. 5m). The foregut and esophagus also  
523 stain brightly.

524

525 Figs. 5o and 5o' show the tracheae and SGs at higher magnification, in side views of an embryo  
526 expressing both Sas<sup>FL</sup> and dArc1 in SGs. The dorsal tracheal trunk (arrow) and the transverse  
527 connective (arrowhead) both display bright *dArc1* FISH signals. Note that, because this is a  
528 confocal image (optical section), the cells at the edges of the tracheal trunk are bright, while the  
529 hollow lumen is dark. The brightness of the tracheal FISH signal suggests that it represents not  
530 only *dArc1* mRNA transferred from capsids, but *dArc1* mRNA synthesized in these cells in  
531 response to dArc1 protein made from the transported capsid mRNA. If this is correct, it would  
532 represent an amplification mechanism in which translated *dArc1* mRNA from EVs can induce  
533 expression of much more *dArc1* mRNA in the recipient cells. Finally, we examined whether the  
534 Sas ICD is required for *dArc1* mRNA transport by expressing dArc1 together with a protein

535 (Sas<sup>ECD-TM</sup>-GFP) in which the Sas ICD was replaced by GFP. This protein is present in EVs  
536 when expressed in S2 cells, but it does not produce any *dArc1* FISH signal outside of the SGs  
537 (Supp. Fig. 4i), indicating that it cannot facilitate transport of *dArc1* capsids to tracheal cells.  
538

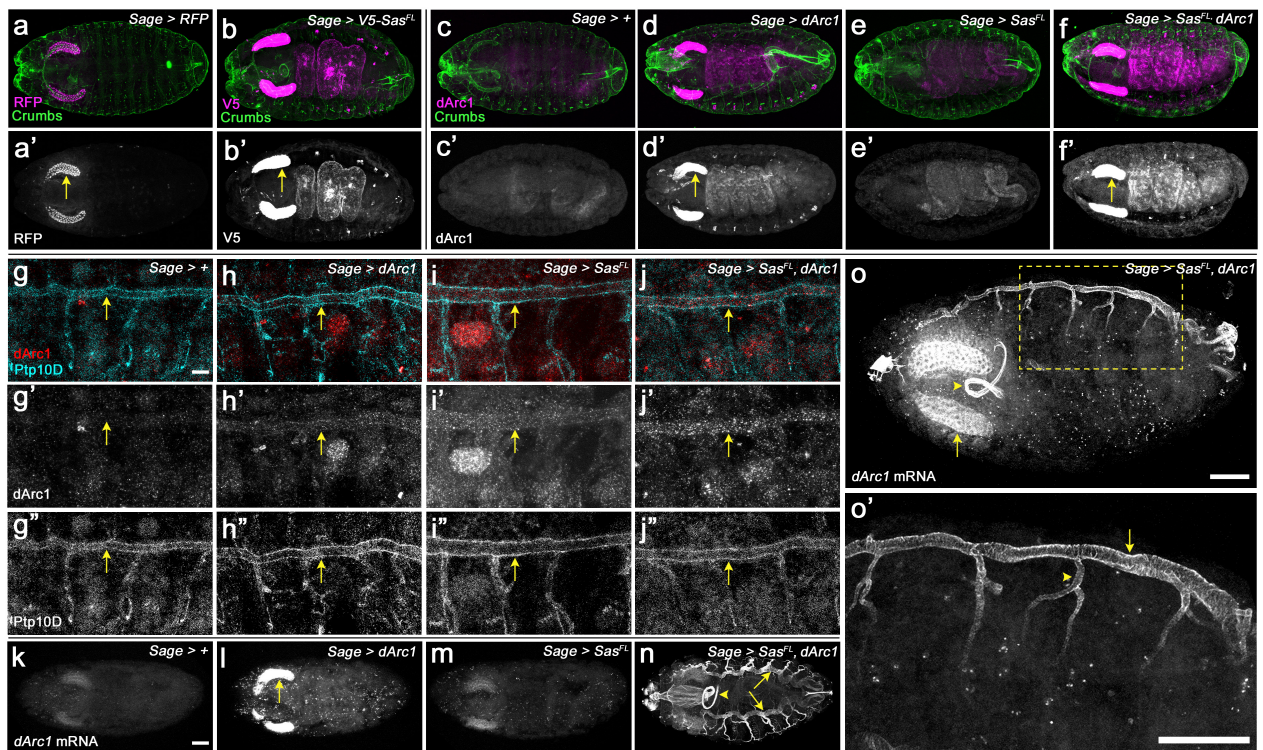

539

540 **Fig. 5. Sas facilitates transfer of dArc1 capsids bearing dArc1 mRNA into distant cells *in***

541 ***in vivo*. a-b**, localization of RFP (a) and V5-Sas<sup>FL</sup> (b) driven by Sage-GAL4. Whole-mount late  
542 stage 16 embryos (top-down view, anterior to the left) were double-stained with anti-RFP (a) or  
543 anti-V5 (b) (magenta) plus anti-Crumbs (apical marker, expressed in epithelia, including  
544 tracheae; green). a' shows the RFP channel alone, and b' shows the V5 channel. Arrows, SGs.

545 Note that V5-Sas<sup>FL</sup> is observed in the gut and peripheral dots, while RFP is retained in the SGs.

546 **c-f**, localization of dArc1 protein in whole-mount late stage 16 embryos. c, control (Sage-  
547 GAL4/+); d, Sage>dArc1; e, Sage>Sas<sup>FL</sup>; f, Sage>Sas<sup>FL</sup> + dArc1. c-f show double-staining with  
548 anti-dArc1 (magenta) and anti-Crumbs (green). c'-f' show the dArc1 channel alone. Arrows,

549 SGs. Bright dArc1 SG staining is observed when dArc1 is expressed. When Sas<sup>FL</sup> and dArc1  
550 are both expressed, bright dArc1 staining of the gut and peripheral dots is observed. Weaker

551 gut staining is observed when dArc1 is expressed alone. **g-j**, localization of dArc1 protein and

552 Ptp10D in high-magnification views of body walls from fillets of late stage 16 embryos (anterior



553 to the left, dorsal up). **g**, control (*Sage-GAL4/+*); **h**, *Sage>dArc1*; **i**, *Sage>Sas<sup>FL</sup>*; **j**, *Sage>Sas<sup>FL</sup> +*  
554 *dArc1*. **g-j** show double-staining with anti-dArc1 (red) and anti-Ptp10D (blue). **g'-j'** show the  
555 dArc1 channel alone. **g''-j''** show the Ptp10D channel alone. Arrows, dorsal tracheal trunk.  
556 There are numerous bright dArc1 puncta in the tracheal trunk when Sas<sup>FL</sup> and dArc1 are  
557 expressed together. Fewer and weaker puncta are observed when Sas<sup>FL</sup> or dArc1 are  
558 expressed alone, and no puncta are seen in *Sage-GAL4/+* controls. **k-n**, *dArc1* mRNA from the  
559 endogenous gene, detected by FISH with a 3' UTR probe. **k**, control (*Sage-GAL4/+*); **l**,  
560 *Sage>dArc1*; **m**, *Sage>Sas<sup>FL</sup>*; **n**, *Sage>Sas<sup>FL</sup> + dArc1*. There is weak expression of dArc1  
561 mRNA in the SGs in controls. When dArc1 (from an ORF construct) is expressed alone, bright  
562 SG staining is observed, indicating that exogenous dArc1 increases expression of endogenous  
563 *dArc1* mRNA. There are also scattered *dArc1* mRNA puncta elsewhere in the embryo. When  
564 Sas<sup>FL</sup> and dArc1 are expressed together, bright *dArc1* mRNA FISH staining of the entire  
565 tracheal system is observed (arrows indicate dorsal tracheal trunks), as well as the foregut  
566 (arrowhead) and esophagus. **o**, **o'**, high-magnification views of *dArc1* mRNA in the tracheae in  
567 an obliquely mounted (anterior to the left, dorsal up) embryo expressing Sas<sup>FL</sup> and dArc1. **o'** is a  
568 higher-magnification inset (yellow dotted outline) from **o**. Arrow in **o**, SG; arrowhead, foregut  
569 loop. Arrow in **o'**, dorsal tracheal trunk; arrowhead, transverse connective. Scale bar in **k**  
570 (applies to **a-f** and **k-n**), 50 μm; scale bar in **g** (applies to **g-j**), 10 μm; scale bar in **o**, 50 μm;  
571 scale bar in **o'**, 50 μm.  
572

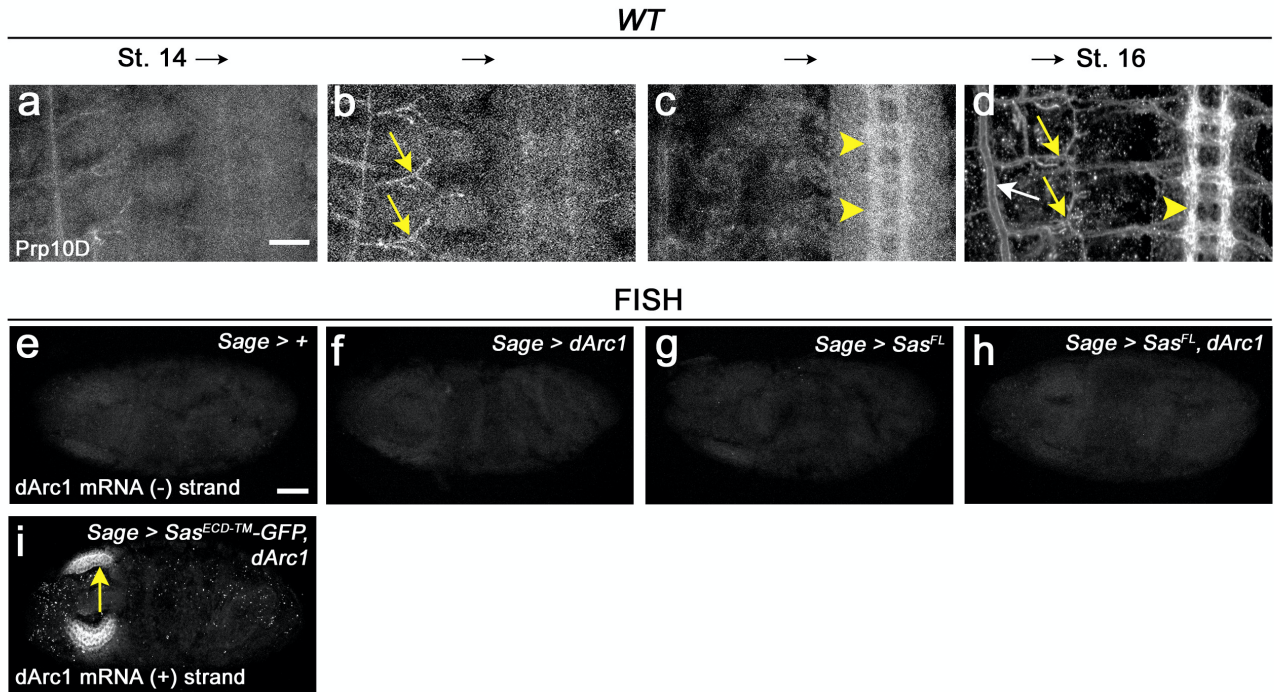

573

574

575 **Supp. Fig. 4. Ptp10D expression, dArc1 sense control FISH data, and dArc1 antisense**

576 **FISH data from embryos expressing Sas<sup>ECD-TM</sup>-GFP and dArc1. a-d, expression of Ptp10D in**

577 **the tracheae (arrows) and VNC axons (arrowheads) of embryos of advancing age, from stage**

578 **14 (a), through stage 15 and early 16 (b and c), to late stage 16 (d). In d, the white arrow**

579 **indicates the dorsal tracheal trunk and the yellow arrow indicates the transverse connective. e-**

580 **h, FISH results with the dArc1 sense probe control for the four genotypes. No specific staining is**

581 **observed. i, FISH analysis of dArc1 mRNA expression in embryos expressing Sas<sup>ECD-TM</sup>-GFP**

582 **and dArc1. The arrow indicates an SG, which stains brightly. There are only scattered puncta**

583 **elsewhere in the embryo.**

584

585

586 **Conclusions**

587 Our results on movement of Sas EVs containing dArc1 capsids are summarized in the diagram  
588 of Fig. 6. These findings contribute to the understanding of intercellular communication  
589 mechanisms by showing that Sas is an EV targeting ligand that directs internalization of EVs  
590 into cells expressing the Sas receptor Ptp10D. dArc1 is related to retrotransposon Gag proteins,  
591 and it forms a capsid that contains *dArc1* mRNA and is loaded into EVs(Ashley *et al.*, 2018).  
592 Sas facilitates transfer of dArc1 capsids into Ptp10D-expressing recipient cells *in vivo*. The Sas  
593 ICD binds directly to dArc1. Mammalian Arc also forms capsids that are transported *via*  
594 EVs(Pastuzyn *et al.*, 2018), and it binds to the Sas and APP ICDs, which share a tyrosine motif.  
595 The connection between Arc and APP will be of interest to explore in future studies, because  
596 Arc has been linked to  $\beta$ -amyloid accumulation and AD pathogenesis(Bi *et al.*, 2018; Landgren  
597 *et al.*, 2012; Wu *et al.*, 2011). Also, full-length APP and some of its proteolytic products are  
598 localized to EVs, and EVs from N2a cells bearing tagged APP are internalized into cultured  
599 neurons, but not into glia(Laulagnier *et al.*, 2018). It will be interesting to determine if APP EVs  
600 contain Arc capsids, and if the presence of APP on Arc-containing EVs causes Arc to be  
601 preferentially delivered to a specific population of neurons.

602

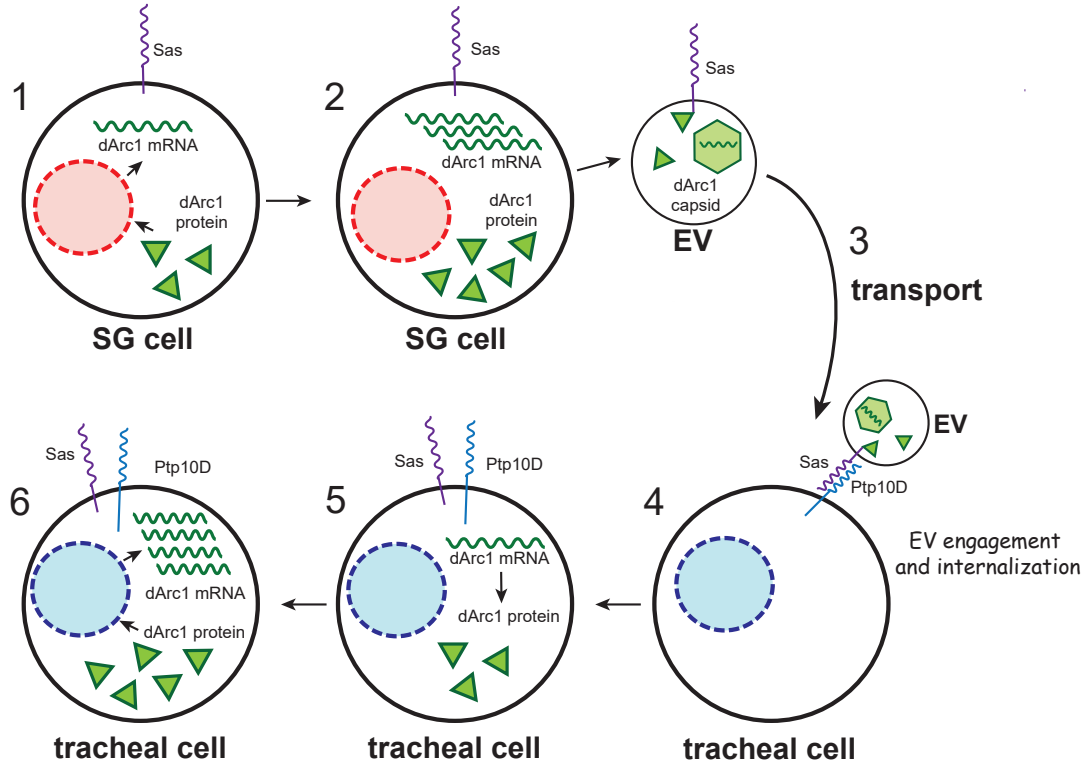

603

604 **Fig. 6. Schematic diagram of the processes involved in movement of EVs bearing Sas**  
605 **and dArc1 capsids from salivary glands to tracheal cells.** Steps 1 and 2, expression of the  
606 dArc1 ORF induces accumulation of *dArc1* mRNA in SGs. EVs with Sas<sup>FL</sup> on their surfaces  
607 bearing dArc1 capsids diffuse or are transported through the hemolymph (Step 3) and bind to  
608 Ptp10D-expressing tracheal cells (Step 4). The EVs internalize into the tracheal cells and  
609 release *dArc1* mRNA (Step 5), and dArc1 protein induces high-level expression of more *dArc1*  
610 mRNA.

611

612

## 613 **Methods**

### 614 **Fly stocks and genetics**

615 The following stocks were used: *yw* for wild-type control, *ap-GAL4* (Bloomington 50156), *UAS-*  
616 *mCD8::GFP* (Bloomington 5130), *UAS-myr::mRFP* (Bloomington 7118), *UAS-mCherry.NLS*  
617 (Bloomington 38424), *sas*<sup>15</sup> (null mutant)(Bloomington 2098), *Sage-GAL4* (a gift from Deborah  
618 J. Andrew), *Ptp10D<sup>EP1172</sup>* (Bloomington 11332), *UAS-dArc1* (Bloomington 37532), *UAS-Numb*  
619 (a gift from Yuh Nung Jan), *UAS-Sas<sup>FL</sup>* and *UAS-V5-Sas<sup>FL</sup>* (Lee et al., 2013), *Arc1<sup>esm18</sup>*  
620 (Bloomington 37530). Crosses and embryo collections were performed at room temperature.  
621 For overexpression experiments, embryos were shifted to 29°C for at least 120 min prior to  
622 fixation and staining and 3<sup>rd</sup> instar larvae were shifted to 29°C for overnight for further analysis.  
623 For the EV targeting experiments (Figs. 3c-e), imaginal discs from 3<sup>rd</sup> instar larvae were  
624 harvested at room temperature and incubated in 200 µl of S2 supernatant overnight at 29°C  
625 before fixation and staining. There are 10,000-50,000 cells in a 3<sup>rd</sup> instar imaginal disc. Given  
626 the results from the NTA analysis, we can conclude that ~140,000 EVs are present in 200 µl of  
627 supernatant from V5-Sas<sup>FL</sup>-expressing S2s cells. We used 5 wing discs per incubation, so the  
628 ratio of EVs to cells is ~0.5 to ~2. The relative V5 signal intensities on the imaginal discs were  
629 measured by densitometry analysis using ImageJ software.

### 630 **Immunohistochemistry**

631 Embryos and larval tissues were stained with standard immunohistochemical procedures. The  
632 following antibodies were used: rabbit anti-V5 (1:1,000, Invitrogen); mouse anti-GFP (1:1,000,  
633 Invitrogen); rabbit-anti-Sas<sup>FL</sup> (1:2,000, gift of D. Cavener); rat-anti-Sas<sup>short</sup> (1:50, GenScript USA  
634 Inc.); mAb Cq4 against crumbs (1:100, DSHB); guinea pig-anti-Numb (1:1,000, gift from J.  
635 Skeath); rabbit-anti-dArc1 (1:100, gift from T. Thomson); mAb 8B2 against Ptp10D (1:5, DSHB);  
636 mAb MR1A against Prospero (1:40, DSHB); rat-anti-Repo (1/2,000, gift from S. Banerjee);

637 rabbit anti-Evi (Wntless, 1:5000, gift from K. Basler); FITC-conjugated phalloidin (1:1,000,  
638 Thermo Fisher Scientific); AlexaFluor 488 anti-mouse, AlexaFluor 488 anti-rat, AlexaFluor 568  
639 anti-rabbit, AlexaFluor 568 anti-rat and AlexaFluor 647 anti-mouse (1:1,000, Invitrogen). Rat  
640 anti-Sas<sup>short</sup> antibody was generated against a synthetic peptide, HSSIPANGANNLQP, flanking  
641 the EVT region (intron is between the N and G residues) and the KLH-conjugated antibody was  
642 purified by protein G column (GenScript USA Inc.). Samples were mounted in VECTASHIELD  
643 (Vector Laboratories) and analyzed on a Zeiss LSM 880.

644

#### 645 **Cell culture and preparation of EVs and cell lysates**

646 EVs and cell lysates were prepared from S2 cells that were cultured for four days at 22°C in  
647 Schneider's medium (Gibco) supplemented with 10% exosome-free FBS (#EXO-FBSHI-50A-1,  
648 SBI) to avoid contamination from Bovine serum exosomes. DNA constructs were transiently  
649 transfected into S2 cells using Effectene (Qiagen). EVs for Western blot analysis (Fig. 1c) and  
650 electron microscopy (Figs. 2 and Supp. Fig.) were collected using Total Exosome Isolation  
651 reagent (#4478359, Invitrogen) from the supernatants of S2 cultures. This kit has been found to  
652 produce exosomes of equivalent quality from mammalian cells (with respect to the presence of  
653 exosome markers and the depletion of non-exosome proteins) to those generated using  
654 ultracentrifugation (Skottvoll *et al.*, 2019). One part of the reagent and two parts of supernatant  
655 were mixed and incubated at 4°C overnight. Pellets of EVs were collected after centrifugation at  
656 10,000 x *g* for 60 minutes at 4°C. The EV pellets were resuspended in PBS for Western blot  
657 analysis. For the EV targeting experiments between S2 cells (Fig. 3f), supernatants from  
658 transiently transfected donor cells were collected and filtered using 0.22 µm PVDF membrane  
659 before resuspension and incubation with the recipient cells. Two days before the supernatant  
660 swap between EV donor and recipient cell cultures, the recipient cells were transiently  
661 transfected with DNA constructs. The recipient cells were incubated in the supernatants with  
662 EVs from donor cells for 48 hours at 22°C. For Western blot analyses, cell lysates were

663 prepared using RIPA cell lysis buffer. To measure the size and number of EV particles from S2  
664 cell culture, collected EV pellets were subjected to NTA by System Biosciences, LLC (Palo Alto,  
665 CA, USA) (Supp. Fig. 2d-e). The NTA measurements rely on light scattering to extract particle  
666 size and the number of particles in a sample and the NTA software (Version 2.3) collects data  
667 on multiple particles to calculate the hydrodynamic diameter of each particle using the Stokes-  
668 Einstein equation (System Biosciences, LLC).

669

### 670 **Mass spectrometry analysis.**

671 Samples were lyophilized and proteins were trypsin-digested as previously described (Pierce et  
672 al., 2013). 200ng of digested peptides were analyzed as previously described (Sung et al.,  
673 2016). Briefly, peptides were loaded onto a 26-cm analytical HPLC column (75  $\mu$ m inner  
674 diameter) packed with ReproSil-Pur C<sub>18AQ</sub> 1.9- $\mu$ m resin (120-Å pore size; Dr. Maisch,  
675 Ammerbuch, Germany). Peptides were separated with a 120-min gradient at a flow rate of 350  
676 nl/min at 50°C (column heater) using the following gradient: 2–6% solvent B (7.5 min), 6–25% B  
677 (82.5 min), 25–40% B (30 min), 40–100% B (1 min), and 100% B (9 min), where solvent A was  
678 97.8% H<sub>2</sub>O, 2% ACN, and 0.2% formic acid, and solvent B was 19.8% H<sub>2</sub>O, 80% ACN, and  
679 0.2% formic acid. Samples were analyzed using an EASY-nLC 1000 coupled to an Orbitrap  
680 Fusion operated in data-dependent acquisition mode to automatically switch between a full scan  
681 ( $m/z$  = 350–1500) in the Orbitrap at 120,000 resolving power and an MS/MS scan of higher-  
682 energy collisional dissociation fragmentation detected in the ion trap (using TopSpeed). The  
683 automatic gain control (AGC) targets of the Orbitrap and ion trap were 400,000 and 10,000.

684

### 685 **Mass spectrometry data**

686 Raw data were searched using MaxQuant (version 1.5.3.30) (Cox and Mann, 2008; Wagner et  
687 al., 2011) against the Uniprot D melanogaster database. Fragment ion tolerance was 0.5 Da.  
688 Precursor mass tolerance was 4.5 ppm after automatic recalibration. Searches were permitted

689 up to two missed tryptic peptide cleavages. Cysteine carbamidomethylation was designated as  
690 a fixed modification while Methionine oxidation and N-terminal acetylation were designated as  
691 variable modifications. False discovery rates were estimated to be <1% using a target-decoy  
692 approach. Complete data are in Supp. Table 1.

693

#### 694 **Protein expression and purification**

695 To express and purify Arc proteins in the *E. coli* system, the cDNAs of dArc1, dArc2 and rArc  
696 were subcloned into the pGEX-4T-1 vectors together with GST-6xHis-tags and TEV protease  
697 cleavage site. Arc proteins were expressed in *E. coli* strain BL21 (DE3) grown in LB broth by  
698 induction of log-phase cultures with 1 mM isopropyl- $\beta$ -D-thiogalactopyranoside (IPTG) and  
699 incubated overnight at 23°C. Cells were pelleted and resuspended in B-PER lysis buffer  
700 (#78243, Thermo Scientific) before centrifugation to collect cell lysates.

701 Tagged Arc proteins were pulled down using Ni-NTA resin column and the eluates with GST-  
702 6xHis-dArc1 and -rArc proteins were used for peptide binding assays (Fig. 4d). For negative  
703 stain EM (Fig. 2 and Supp. Fig. 2), the GST-6xHis-tag was removed by TEV protease  
704 (#P8112S, NEB) and dArc1 and dArc2 proteins were further purified by size exclusion  
705 chromatography using Superdex S200 16/600 (GE Healthcare Life Sciences).

706

#### 707 **Western blotting**

708 Proteins were separated by SDS-PAGE, transferred at 200 mA for 60 minutes to nitrocellulose  
709 membranes using a Bio-Rad Wet Tank Blotting System in Tris-Glycine Transfer Buffer with 10%  
710 methanol. Blocked membranes were incubated with primary antibodies in 0.5% milk PBS-0.1%  
711 Tween for overnight. HRP-conjugated antibodies (anti-V5-HRP (#RV5-45P-Z, ICL), anti-mouse  
712 IgG HRP (#sc-516102, Santa Cruz Biotechnology), anti-beta-actin-HRP (#HRP-60008,  
713 Proteintech), anti-rabbit IgG HRP (#65-6120, Invitrogen), anti-rat IgG HRP (#35470, Invitrogen),



714 anti-alpha-tubulin-HRP (#HRP-66031, Proteintech), anti-cMyc-HRP (#RMYC-45P-Z, ICL), and  
715 anti-GST-HRP (#MA4-004-HRP, Invitrogen)) were used at 1:10,000 for 60 minutes. Blots were  
716 developed using ECL Western Blotting Substrate (#32109, Pierce), and imaged on a MINI-MED  
717 90 X-Ray Film Processor (AFP Manufacturing Co.).

## 718 **Electron microscopy**

### 719 **Negative stain EM of purified capsids**

720 dArc1 and dArc2 capsids were examined using negative staining. Briefly, continuous carbon  
721 grids (copper, 300 mesh, Electron Microscopy Sciences) were glow discharged for 1 minutes at  
722 15 mA on a PELCO easiGLOW (Ted Pella). 3  $\mu$ L of sample was applied to grids and allowed to  
723 incubate for 60s. Grids were then blotted and stained with 2% (w/v) uranyl acetate solution for  
724 30s. After blotting, grids were allowed to dry for at least 1 hour. Grids were imaged on a Tecnai  
725 T12 transmission electron microscope (Thermo Fisher Scientific) operating at 120 kV. Images  
726 were recorded on the Gatan Ultrascan camera (Gatan / Ametec).

### 727 **Electron Tomography and Immuno-EM**

728 For imaging of EVs by electron tomography (ET), EVs were prepared as described above.  
729 Supernatant was removed and replaced with ~10 ml 10% Ficoll, 5% sucrose in 0.1M sodium  
730 cacodylate trihydrate with minimal disturbance of the pellet. Pellets were transferred to brass  
731 planchettes (type A/B; Ted Pella, Inc.) and ultra-rapidly frozen with a HPM-010 high-pressure  
732 freezing machine (Bal-Tec/ABRA). Vitrified samples were transferred under liquid nitrogen to  
733 cryo-tubes (nunc) containing a frozen solution of 2.5% osmium tetroxide, 0.05% uranyl acetate  
734 in acetone and placed in an AFS-2 Freeze-Substitution Machine (Leica Microsystems, Vienna).  
735 Samples were freeze-substituted at -90°C for 72 h, warmed to -20°C over 12 h, held at -20° for  
736 12 h, then warmed to room temperature. Samples were rinsed 3x with acetone and infiltrated

737 into Epon-Araldite resin (Electron Microscopy Sciences). Resin was polymerized at 60°C for 24  
738 h.

739

740 Serial semi-thin (170 nm) sections were cut with a UC6 ultramicrotome (Leica Microsystems)  
741 using a diamond knife (Diatome Ltd., Switzerland). Sections were collected onto Formvar-coated  
742 copper/rhodium slot grids (Electron Microscopy Sciences) and stained with 3% uranyl acetate  
743 and lead citrate. Colloidal gold particles (10 nm) were placed on both surfaces of the grid to  
744 serve as fiducial markers for subsequent image alignment. Grids were placed in a dual-axis  
745 tomography holder (Model 2040; Fischione Instruments, Inc.) and imaged with a Tecnai T12  
746 transmission electron microscope (Thermo-Fisher Scientific) at 120k eV. For dual-axis  
747 tomography, grids were tilted +/- 62° and images acquired at 1° intervals. The grid was rotated  
748 90° and a similar tilt-series was recorded about the orthogonal axis. Tilt-series data was  
749 acquired automatically using the SerialEM software package. Tomographic data was  
750 calculated, analyzed and modeled on iMac Pro and M1 computers (Apple, Inc) using the IMOD  
751 software package.

752

753 For immuno-EM, EV pellets were prepared as per above. Supernatant was removed and  
754 pellets fixed with 4% paraformaldehyde in PBS for 1 hr. Pellets were then infiltrated with 2.1M  
755 sucrose in PBS over 24 h, with >3 changes of the infiltration solution during that time. Pellets  
756 were placed onto aluminum sectioning stubs, drained of excess liquid and frozen in liquid  
757 nitrogen. Cryosections (100 nm) were cut at -140°C with a UC6/FC6 cryoultramicrotome (Leica  
758 Microsystems) using cryo-diamond knives (Diatome Ltd). Cryosections were collected with a  
759 wire loop containing 2.3 M sucrose in PBS and transferred to Formvar-coated, carbon-coated,  
760 glow-discharged 100-mesh copper/rhodium grids (Electron Microscopy Sciences) at room  
761 temperature. Nonspecific antibody binding sites were blocked by incubating the grids with 10%  
762 calf serum in PBS for 30'. Sections were then labeled with 1° antibodies (diluted in 5% calf

763 serum/PBS) for 2 h, rinsed 4x with PBS, then labeled with 10 nm and/or 15 nm gold-conjugated  
764 2° antibodies (diluted in 5% calf serum/PBS) for 2 hrs. Grids were rinsed 4x with PBS, 3x with  
765 dH<sub>2</sub>O then simultaneously negatively-stained and stabilized with 1% uranyl acetate, 1%  
766 methylcellulose in dH<sub>2</sub>O. Immuno-EM samples were imaged as per the tomography samples,  
767 above.

768

### 769 **Immunoprecipitation**

770 For the Myc-co-IP assay (Fig. 4c), transiently transfected S2 cells using Effectene (Qiagen)  
771 were cultured in Schneider's medium at 22 °C for four days. Tagged expression constructs (V5-  
772 mCD8<sup>ECD</sup>-sas<sup>TM-ICD</sup>, V5-mCD8<sup>ECD</sup>-APP<sup>ICD</sup>, V5-mCD8<sup>ECD</sup>-AppI<sup>ICD</sup>, dArc1-Myc and Myc-rArc) were  
773 cloned in pAc5.1B vector according to standard cloning procedure. For IP analysis, cell lysates  
774 were prepared using IP Lysis buffer (#87787, Pierce) and the lysates were incubated in Myc-  
775 Trap agarose (#yta-20, Chromotek) following the manufacturer's protocol and the eluates were  
776 analyzed by standard Western blot analysis.

777

### 778 **Peptide binding assay**

779 For the peptide binding assay (Fig. 4d), biotinylated peptides (wt Sas<sup>ICD</sup>, Sas<sup>ICD</sup> variations  
780 (scrambled and  $\Delta$ YDNPSY), APP<sup>ICD</sup> and AppI<sup>ICD</sup>) made by RS Synthesis, Inc., were incubated  
781 with Streptavidin magnetic beads (#88817, Pierce) for 45 minutes at 4°C and the beads were  
782 extensively washed with TBST. Purified GST-6xHis-dArc1 and rArc proteins were added to the  
783 beads with bound biotinylated peptides and incubated at 4°C overnight. Similar experiments  
784 were performed with Numb PTB domain protein purified from *E. coli*. The beads were carefully  
785 washed with TBST and eluates prepared for Western blot analysis following the standard  
786 protocol described above.

787

788 **Fluorescent in situ hybridization (FISH)**

789 The FISH protocol was a modification of protocols from (Kosman et al., 2004). Fixed L16 whole  
790 embryos were prepared using standard protocols and rinsed with ethanol quickly four times.  
791 Then the embryos were permeabilized twice with a mixture of xylenes and ethanol (1:2, v/v) and  
792 washed three times with ethanol for 5 minutes each. To rehydrate the embryos, the embryos  
793 were washed with 100%, 50% and 0% methanol in PBT sequentially for 30 minutes each step.  
794 The rehydrated embryos were permeabilized again using proteinase K (20ug/mL in PBT) for  
795 exactly 7 minutes and washed three times for 5 minutes each in PBT followed by a second  
796 fixation (5% paraformaldehyde and 1% DMSO in PBT) for 25 minutes and washed three times  
797 in PBT for 5 minutes each. Then the embryos were prepared for pre-hybridization by incubation  
798 in 50% hybridization buffer (50% formamide, 5x SSC, 100 µg/ml fragmented salmon testes  
799 DNA, 50 µg/ml heparin, 0.1% Tween-20) in PBT for 5 minutes. For pre-hybridization, embryos  
800 were incubated in hybridization buffer for more than 90 minutes at 55°C while changing the  
801 buffer every 30 minutes. The pre-hybridized embryos were incubated in DIG-tagged dArc1  
802 mRNA probe for 18 hours at 55°C for annealing. The embryos were washed with hybridization  
803 buffer three times for 30 minutes each at 55°C, after which the buffer was replaced with replaced  
804 the buffer with PBT containing rhodamine-conjugated sheep anti-DIG antibody (#11207750910,  
805 SigmaAldrich) overnight at 4°C. Then the embryos were washed and mounted for confocal  
806 microscopy.

807

808 **Probe preparation**

809 Probes were designed against a 760 nt region of dArc1 mRNA 3' UTR sequence, which was  
810 used for FISH in a previous study (Ashley *et al.*, 2018). To generate antisense and sense  
811 probes for dArc1 mRNA, cDNA sequences from *dArc1* were PCR amplified and purified to use  
812 as positive and negative probe templates. The DNA templates were heated to 55°C for two  
813 minutes and then put back on ice. Transcription reactions were set up to label probes with

814 digoxigenin (DIG, # 11277073910, Roche) and incubated at 37°C for two hours. Probes were  
815 precipitated and resuspended in hybridization buffer and stored at -20°C.

816 The following primers were used to generate dArc1 mRNA probes:

817 dArc1 probe forward primer: GATTTTTCGTCTGATCCTGGTC

818 dArc1 probe reverse primer: CCGTTTCTGAGTTTAATGGTTG

819

820 **Acknowledgments**

821 Mass spectrometry work was performed at the Caltech Proteome Exploration Laboratory.  
822 Imaging was done at the Caltech Biological Imaging facility. EM work was done at the Caltech  
823 Cryo-EM facility. We thank Andre Malyutin for negative stain EM. We thank Violana Nesterova  
824 for figure preparation. We thank the following colleagues for reagents and *Drosophila* lines:  
825 Jason Shepherd (University of Utah) for pGEX-dArc and rArc constructs; Travis Thomson and  
826 Vivian Budnik (University of Massachusetts) for rabbit anti-Arc1; Douglas Cavener (Penn State)  
827 for rabbit anti-Sas<sup>FL</sup>; Deborah Andrew (Johns Hopkins) for *Sage-GAL4*; James Skeath  
828 (Washington University) for guinea pig anti-Numb; Swati Banerjee (UTHSC, San Antonio) for rat  
829 anti-Repo, and Yuh-Nung Jan (UCSF) for *UAS-Numb*. We thank Simon Erlendsson, Fernando  
830 Bazan, Paul Worley, and Tino Pleiner for discussions about Arc purification and Arc and Sas  
831 structures. This work was supported by NIH RO1 grants NS28182 and NS096509 to K.Z., and  
832 by Howard Hughes Medical Institute support to R. Deshaies, who was J.M.R.'s faculty  
833 supervisor when he was a postdoctoral fellow at Caltech.

834

835 **Author Contributions**

836 P. H. L. designed and performed the majority of the experiments. M.A. helped with protein  
837 biochemistry work. M.S.L. performed the immuno-EM and EM tomography experiments. J.M.R.  
838 performed the mass spectrometry analysis of V5 IPs from EVs. P. H. L. and K.Z. wrote the  
839 manuscript. K.Z. directed the project.

840

841

842

843

844

845

846

847 **List of Abbreviations**

848 aa: amino acid

849 AD: Alzheimer's disease

850 Ap: apterous

851 APP: amyloid precursor protein

852 Co-IP: coimmunoprecipitation

853 CSP: cell surface protein

854 ECD: extracellular domain

855 EM: electron microscopy

856 EV: extracellular vesicle

857 EVT: 345 aa region absent from Sas PA/PC isoform

858 FISH: fluorescence in situ hybridization

859 FN-III: Fibronectin Type III

860 GOF: gain of function (overexpression)

861 ICD: cytoplasmic domain

862 immuno-EM: immuno-electron microscopy

863 MVB: multivesicular body

864 NMJ: neuromuscular junction

865 NTA: nanoparticle tracking analysis

866 ORF: open reading frame

867 PTB: phosphotyrosine binding

868 Ptp10D: Drosophila receptor tyrosine phosphatase gene located at 10D on the chromosome

869 map

870 RPTP: receptor tyrosine phosphatase

871 Sas: Stranded at second

872 Sas<sup>FL</sup>: full-length Sas (PB/PD isoform)

873 Sas<sup>short</sup>: Sas isoform lacking EVT region (PA/PC isoform)

874 SG: salivary gland

875 TM: transmembrane

876 UAS: upstream activation sequence

877 UTR: untranslated region

878 VFWC: von Willebrand factor C

879 VNC: ventral nerve cord

880



881 **References**

882

- 883 Ashley, J., Cordy, B., Lucia, D., Fradkin, L. G., Budnik, V., and Thomson, T. (2018).  
884 Retrovirus-like Gag Protein Arc1 Binds RNA and Traffics across Synaptic Boutons. *Cell* 172,  
885 262–274 e211. [10.1016/j.cell.2017.12.022](https://doi.org/10.1016/j.cell.2017.12.022).
- 886 Bi, R., Kong, L. L., Xu, M., Li, G. D., Zhang, D. F., Alzheimers Disease Neuroimaging, I., Li, T.,  
887 Fang, Y., Zhang, C., Zhang, B., and Yao, Y. G. (2018). The Arc Gene Confers Genetic  
888 Susceptibility to Alzheimers Disease in Han Chinese. *Mol Neurobiol* 55, 1217–1226.  
889 [10.1007/s12035-017-0397-6](https://doi.org/10.1007/s12035-017-0397-6).
- 890 Chien, C. T., Wang, S., Rothenberg, M., Jan, L. Y., and Jan, Y. N. (1998). Numb-associated  
891 kinase interacts with the phosphotyrosine binding domain of Numb and antagonizes the  
892 function of Numb in vivo. *Mol Cell Biol* 18, 598–607.
- 893 Chowdhury, S., Shepherd, J. D., Okuno, H., Lyford, G., Petralia, R. S., Plath, N., Kuhl, D.,  
894 Huganir, R. L., and Worley, P. F. (2006). Arc/Arg3.1 interacts with the endocytic machinery  
895 to regulate AMPA receptor trafficking. *Neuron* 52, 445–459.  
896 [10.1016/j.neuron.2006.08.033](https://doi.org/10.1016/j.neuron.2006.08.033).
- 897 Colicelli, J. (2010). ABL tyrosine kinases: evolution of function, regulation, and specificity.  
898 *Sci Signal* 3, re6. [10.1126/scisignal.3139re6](https://doi.org/10.1126/scisignal.3139re6).
- 899 Cox, J., and Mann, M. (2008). MaxQuant enables high peptide identification rates,  
900 individualized p.p.b.-range mass accuracies and proteome-wide protein quantification.  
901 *Nat Biotechnol* 26, 1367–1372. [10.1038/nbt.1511](https://doi.org/10.1038/nbt.1511).
- 902 Erlendsson, S., Morado, D. R., Cullen, H. B., Feschotte, C., Shepherd, J. D., and Briggs, J. A. G.  
903 (2020). Structures of virus-like capsids formed by the Drosophila neuronal Arc proteins.  
904 *Nat Neurosci* 23, 172–175. [10.1038/s41593-019-0569-y](https://doi.org/10.1038/s41593-019-0569-y).
- 905 Hallin, E. I., Markusson, S., Bottger, L., Torda, A. E., Bramham, C. R., and Kursula, P. (2021).  
906 Crystal and solution structures reveal oligomerization of individual capsid homology  
907 domains of Drosophila Arc. *PloS one* 16, e0251459. [10.1371/journal.pone.0251459](https://doi.org/10.1371/journal.pone.0251459).
- 908 Hantak, M. P., Einstein, J., Kearns, R. B., and Shepherd, J. D. (2021). Intercellular  
909 Communication in the Nervous System Goes Viral. *Trends Neurosci* 44, 248–259.  
910 [10.1016/j.tins.2020.12.003](https://doi.org/10.1016/j.tins.2020.12.003).
- 911 Keith, S. A., Bishop, C., Fallacaro, S., and McCartney, B. M. (2021). Arc1 and the microbiota  
912 together modulate growth and metabolic traits in Drosophila. *Development* 148.  
913 [10.1242/dev.195222](https://doi.org/10.1242/dev.195222).

914 Koppen, T., Weckmann, A., Muller, S., Staubach, S., Bloch, W., Dohmen, R. J., and  
915 Schwientek, T. (2011). Proteomics analyses of microvesicles released by *Drosophila* Kc167  
916 and S2 cells. *Proteomics* *11*, 4397–4410. [10.1002/pmic.201000774](https://doi.org/10.1002/pmic.201000774).  
917 Kosman, D., Mizutani, C. M., Lemons, D., Cox, W. G., McGinnis, W., and Bier, E. (2004).  
918 Multiplex detection of RNA expression in *Drosophila* embryos. *Science* *305*, 846.  
919 [10.1126/science.1099247](https://doi.org/10.1126/science.1099247).  
920 Landgren, S., von Otter, M., Palmer, M. S., Zetterstrom, C., Nilsson, S., Skoog, I., Gustafson,  
921 D. R., Minthon, L., Wallin, A., Andreasen, N., et al. (2012). A novel ARC gene polymorphism  
922 is associated with reduced risk of Alzheimers disease. *J Neural Transm (Vienna)* *119*, 833–  
923 842. [10.1007/s00702-012-0823-x](https://doi.org/10.1007/s00702-012-0823-x).  
924 Laulagnier, K., Javalet, C., Hemming, F. J., Chivet, M., Lachenal, G., Blot, B., Chatellard, C.,  
925 and Sadoul, R. (2018). Amyloid precursor protein products concentrate in a subset of  
926 exosomes specifically endocytosed by neurons. *Cell Mol Life Sci* *75*, 757–773.  
927 [10.1007/s00018-017-2664-0](https://doi.org/10.1007/s00018-017-2664-0).  
928 Lee, H. K., Cording, A., Vielmetter, J., and Zinn, K. (2013). Interactions between a Receptor  
929 Tyrosine Phosphatase and a Cell Surface Ligand Regulate Axon Guidance and Glial–  
930 Neuronal Communication. *Neuron* *78*, 813–826. [10.1016/j.neuron.2013.04.001](https://doi.org/10.1016/j.neuron.2013.04.001).  
931 Lefebvre, F. A., Benoit Bouvrette, L. P., Perras, L., Blanchet–Cohen, A., Garnier, D., Rak, J.,  
932 and Lecuyer, E. (2016). Comparative transcriptomic analysis of human and *Drosophila*  
933 extracellular vesicles. *Scientific reports* *6*, 27680. [10.1038/srep27680](https://doi.org/10.1038/srep27680).  
934 Li, S. C., Zwahlen, C., Vincent, S. J., McGlade, C. J., Kay, L. E., Pawson, T., and Forman–Kay,  
935 J. D. (1998). Structure of a Numb PTB domain–peptide complex suggests a basis for diverse  
936 binding specificity. *Nat Struct Biol* *5*, 1075–1083. [10.1038/4185](https://doi.org/10.1038/4185).  
937 Matsui, T., Osaki, F., Hiragi, S., Sakamaki, Y., and Fukuda, M. (2021). ALIX and ceramide  
938 differentially control polarized small extracellular vesicle release from epithelial cells.  
939 *EMBO reports* *22*, e51475. [10.15252/embr.202051475](https://doi.org/10.15252/embr.202051475).  
940 Mattaliano, M. D., Montana, E. S., Parisky, K. M., Littleton, J. T., and Griffith, L. C. (2007). The  
941 *Drosophila* ARC homolog regulates behavioral responses to starvation. *Molecular and*  
942 *cellular neurosciences* *36*, 211–221. [10.1016/j.mcn.2007.06.008](https://doi.org/10.1016/j.mcn.2007.06.008).  
943 Mosher, J., Zhang, W., Blumhagen, R. Z., DAlessandro, A., Nemkov, T., Hansen, K. C.,  
944 Hesselberth, J. R., and Reis, T. (2015). Coordination between *Drosophila* Arc1 and a specific  
945 population of brain neurons regulates organismal fat. *Dev Biol* *405*, 280–290.  
946 [10.1016/j.ydbio.2015.07.021](https://doi.org/10.1016/j.ydbio.2015.07.021).  
947 Netzer, W. J., Dou, F., Cai, D., Veach, D., Jean, S., Li, Y., Bornmann, W. G., Clarkson, B., Xu, H.,  
948 and Greengard, P. (2003). Gleevec inhibits beta–amyloid production but not Notch  
949 cleavage. *Proc Natl Acad Sci U S A* *100*, 12444–12449. [10.1073/pnas.1534745100](https://doi.org/10.1073/pnas.1534745100).

950 Nielsen, L. D., Pedersen, C. P., Erlendsson, S., and Teilum, K. (2019). The Capsid Domain of  
951 Arc Changes Its Oligomerization Propensity through Direct Interaction with the NMDA  
952 Receptor. *Structure* 27, 1071–1081 e1075. 10.1016/j.str.2019.04.001.

953 OBrien, K., Breyne, K., Ughetto, S., Laurent, L. C., and Breakefield, X. O. (2020). RNA  
954 delivery by extracellular vesicles in mammalian cells and its applications. *Nature reviews*  
955 21, 585–606. 10.1038/s41580-020-0251-y.

956 Pastuzyn, E. D., Day, C. E., Kearns, R. B., Kyrke-Smith, M., Taibi, A. V., McCormick, J., Yoder,  
957 N., Belnap, D. M., Erlendsson, S., Morado, D. R., et al. (2018). The Neuronal Gene Arc  
958 Encodes a Repurposed Retrotransposon Gag Protein that Mediates Intercellular RNA  
959 Transfer. *Cell* 172, 275–288 e218. 10.1016/j.cell.2017.12.024.

960 Perez-Gonzalez, R., Kim, Y., Miller, C., Pacheco-Quinto, J., Eckman, E. A., and Levy, E.  
961 (2020). Extracellular vesicles: where the amyloid precursor protein carboxyl-terminal  
962 fragments accumulate and amyloid-beta oligomerizes. *FASEB J* 34, 12922–12931.  
963 10.1096/fj.202000823R.

964 Pierce, N. W., Lee, J. E., Liu, X., Sweredoski, M. J., Graham, R. L., Larimore, E. A., Rome, M.,  
965 Zheng, N., Clurman, B. E., Hess, S., et al. (2013). Cnd1 promotes assembly of new SCF  
966 complexes through dynamic exchange of F box proteins. *Cell* 153, 206–215.  
967 10.1016/j.cell.2013.02.024.

968 Schonbaum, C. P., Organ, E. L., Qu, S., and Cavener, D. R. (1992). The *Drosophila*  
969 *melanogaster* stranded at second (sas) gene encodes a putative epidermal cell surface  
970 receptor required for larval development. *Dev Biol* 151, 431–445.

971 Shepherd, J. D. (2018). Arc – An endogenous neuronal retrovirus? *Seminars in cell &*  
972 *developmental biology* 77, 73–78. 10.1016/j.semcdb.2017.09.029.

973 Shepherd, J. D., Rumbaugh, G., Wu, J., Chowdhury, S., Plath, N., Kuhl, D., Hugarir, R. L., and  
974 Worley, P. F. (2006). Arc/Arg3.1 mediates homeostatic synaptic scaling of AMPA  
975 receptors. *Neuron* 52, 475–484. 10.1016/j.neuron.2006.08.034.

976 Skottvoll, F. S., Berg, H. E., Bjorseth, K., Lund, K., Roos, N., Bekhradnia, S., Thiede, B.,  
977 Sandberg, C., Vik-Mo, E. O., Roberg-Larsen, H., et al. (2019). Ultracentrifugation versus kit  
978 exosome isolation: nanoLC-MS and other tools reveal similar performance biomarkers, but  
979 also contaminations. *Future Sci OA* 5, FSO359. 10.4155/fsoa-2018-0088.

980 Sung, M. K., Reitsma, J. M., Sweredoski, M. J., Hess, S., and Deshaies, R. J. (2016). Ribosomal  
981 proteins produced in excess are degraded by the ubiquitin-proteasome system. *Mol Biol*  
982 *Cell* 27, 2642–2652. 10.1091/mbc.E16-05-0290.

983 Teng, F., and Fussenegger, M. (2020). Shedding Light on Extracellular Vesicle Biogenesis  
984 and Bioengineering. *Adv Sci (Weinh)* 8, 2003505. 10.1002/advs.202003505.

985 Wagner, S. A., Beli, P., Weinert, B. T., Nielsen, M. L., Cox, J., Mann, M., and Choudhary, C.  
986 (2011). A proteome-wide, quantitative survey of in vivo ubiquitylation sites reveals  
987 widespread regulatory roles. *Mol Cell Proteomics* *10*, M111 013284.  
988 10.1074/mcp.M111.013284.  
989 Wu, J., Petralia, R. S., Kurushima, H., Patel, H., Jung, M. Y., Volk, L., Chowdhury, S., Shepherd,  
990 J. D., Dehoff, M., Li, Y., et al. (2011). Arc/Arg3.1 regulates an endosomal pathway essential  
991 for activity-dependent beta-amyloid generation. *Cell* *147*, 615–628.  
992 10.1016/j.cell.2011.09.036.  
993 Yamamoto, M., Ohsawa, S., Kunimasa, K., and Igaki, T. (2017). The ligand Sas and its  
994 receptor PTP10D drive tumour-suppressive cell competition. *Nature* *542*, 246–250.  
995 10.1038/nature21033.  
996 Zambrano, N., Bruni, P., Minopoli, G., Mosca, R., Molino, D., Russo, C., Schettini, G., Sudol,  
997 M., and Russo, T. (2001). The beta-amyloid precursor protein APP is tyrosine-  
998 phosphorylated in cells expressing a constitutively active form of the Abl protooncogene. *J*  
999 *Biol Chem* *276*, 19787–19792. 10.1074/jbc.M100792200.  
1000 Zhang, W., Wu, J., Ward, M. D., Yang, S., Chuang, Y. A., Xiao, M., Li, R., Leahy, D. J., and  
1001 Worley, P. F. (2015). Structural basis of arc binding to synaptic proteins: implications for  
1002 cognitive disease. *Neuron* *86*, 490–500. 10.1016/j.neuron.2015.03.030.  
1003  
1004
